# Supplementary material
Source: PubMed Central journal article supplement (PMC6071803)
Supplement: EHP2129.s001.acco.pdf [file EHP2129.s001.acco.pdf]

**Note to readers with disabilities:** *EHP* strives to ensure that all journal content is accessible to all readers. However, some figures and Supplemental Material published in *EHP* articles may not conform to [508 standards](#) due to the complexity of the information being presented. If you need assistance accessing journal content, please contact [ehp508@niehs.nih.gov](mailto:ehp508@niehs.nih.gov). Our staff will work with you to assess and meet your accessibility needs within 3 working days.

### **Supplemental Material**

#### **Prenatal Exposure to DDT and Pyrethroids for Malaria Control and Child Neurodevelopment: The VHEMBE Cohort, South Africa**

Brenda Eskenazi, Sookee An, Stephen A. Rauch, Eric S. Coker, Angelina Maphula, Muvhulawa Obida, Madelein Crause, Katherine R. Kogut, Riana Bornman, and Jonathan Chevrier

#### **Table of Contents**

**Table S1.** Wet weight (ug/L) and creatinine-adjusted (g/L) maternal urinary concentrations of pyrethroid metabolites, VHEMBE study, Limpopo South Africa.

**Table S2.** Pearson correlation coefficients for maternal serum concentrations of *p,p'*-DDT and *p,p'*-DDE (log<sub>10</sub> transformed; lipid-adjusted), and urinary concentrations of pyrethroid metabolites (log<sub>10</sub> transformed; specific-gravity adjusted), VHEMBE study (n=705), Limpopo South Africa.

**Table S3.** Adjusted linear regression  $\beta$  coefficient and 95% confidence interval (CI) for the association between maternal urinary pyrethroid metabolite concentrations measured before delivery only (specific gravity-adjusted) and children's performance on the Bayley Scales of Infant Assessment (3<sup>rd</sup> edition) (BSID) at 1 and 2 years, VHEMBE study, Limpopo, South Africa.

**Table S4.** Adjusted linear regression  $\beta$  coefficient and 95% confidence interval (CI) for the association between maternal prenatal *p,p'*-DDT and *p,p'*-DDE serum concentrations (log<sub>10</sub> transformed; lipid-adjusted) and children's performance on the Bayley Scales of Infant Assessment (BSID) (3<sup>rd</sup> edition) at 1 and 2 years, VHEMBE study, Limpopo, South Africa.

**Table S5.** Adjusted linear regression  $\beta$  coefficient and 95% confidence interval (CI) for the association between maternal prenatal urinary pyrethroid metabolite concentration (specific gravity-adjusted) and children's performance on the Bayley Scales of Infant Assessment (3<sup>rd</sup> edition) (BSID) at 1 and 2 years, VHEMBE study, Limpopo, South Africa.

**Table S6.** Adjusted linear regression  $\beta$  coefficient and 95% confidence interval (CI) for the association between maternal prenatal *p,p'*-DDT and *p,p'*-DDE serum concentrations ( $\log_{10}$  transformed; lipid-adjusted) and children's performance on the Bayley Scales of Infant Assessment (BSID) (3<sup>rd</sup> edition) at 1 and 2 years, VHEMBE study, Limpopo, South Africa.

**Table S7.** Adjusted linear regression  $\beta$  coefficient and 95% confidence interval (CI) for the association between maternal prenatal urinary pyrethroid metabolite concentration (specific gravity-adjusted) and children's performance on the Bayley Scales of Infant Assessment (3<sup>rd</sup> edition) (BSID) at 1 and 2 years, VHEMBE study, Limpopo, South Africa.

**Table S8.** Adjusted linear regression  $\beta$  coefficient and 95% confidence interval (CI) for the association between maternal prenatal *p,p'*-DDT and *p,p'*-DDE serum concentrations ( $\log_{10}$  transformed; lipid-adjusted) and children's performance on the Bayley Scales of Infant Assessment (BSID) (3<sup>rd</sup> edition) at 1 and 2 years, VHEMBE study, Limpopo, South Africa.

**Table S9.** Adjusted linear regression  $\beta$  coefficient and 95% confidence interval (CI) for the association between maternal prenatal *p,p'*-DDT and *p,p'*-DDE serum concentrations ( $\log_{10}$  transformed; lipid-adjusted) and children's performance on the Bayley Scales of Infant Assessment (BSID) (3<sup>rd</sup> edition) at 1 and 2 years, VHEMBE study, Limpopo, South Africa.

**Table S10.** Adjusted linear regression  $\beta$  coefficient and 95% confidence interval (CI) for the association between maternal prenatal urinary pyrethroid metabolite concentration (specific gravity-adjusted) and children's performance on the Bayley Scales of Infant Assessment (3<sup>rd</sup> edition) (BSID) at 1 and 2 years, VHEMBE study, Limpopo, South Africa.

**Table S11.** Adjusted linear regression  $\beta$  coefficient and 95% confidence interval (CI) for the association between maternal prenatal urinary pyrethroid metabolite concentration (specific gravity-adjusted) and children's performance on the Bayley Scales of Infant Assessment (3<sup>rd</sup> edition) (BSID) at 1 and 2 years, VHEMBE study, Limpopo, South Africa.

**Table S12.** Adjusted linear regression  $\beta$  coefficient and 95% confidence interval (CI) for the association between maternal prenatal *p,p'*-DDT and *p,p'*-DDE serum concentrations ( $\log_{10}$  transformed; lipid-adjusted) and children's performance on the Bayley Scales of Infant Assessment (BSID) (3<sup>rd</sup> edition) at 1 and 2 years, VHEMBE study, Limpopo, South Africa.

**Table S13.** Adjusted linear regression  $\beta$  coefficient and 95% confidence interval (CI) for the association between maternal prenatal *p,p'*-DDT and *p,p'*-DDE serum concentrations ( $\log_{10}$  transformed; lipid-adjusted) and children's performance on the Bayley Scales of Infant Assessment (BSID) (3<sup>rd</sup> edition) at 1 and 2 years, VHEMBE study, Limpopo, South Africa.

**Table S14.** Adjusted linear regression  $\beta$  coefficient and 95% confidence interval (CI) for the association between maternal prenatal urinary pyrethroid metabolite concentration (specific gravity-adjusted) and children's performance on the Bayley Scales of Infant Assessment (3<sup>rd</sup> edition) (BSID) at 1 and 2 years, VHEMBE study, Limpopo, South Africa.

**Table S15.** Adjusted linear regression  $\beta$  coefficient and 95% confidence interval (CI) for the association between maternal prenatal urinary pyrethroid metabolite concentration (specific gravity-adjusted) and children's performance on the Bayley Scales of Infant Assessment (3<sup>rd</sup> edition) (BSID) at 1 and 2 years, VHEMBE study, Limpopo, South Africa.

**Figure S1.** Directed Acyclic Graph (DAG) of possible confounding in the relationship between DDT/pyrethroid insecticides and children's performance on the Bayley Scales of Infant Assessment (3<sup>rd</sup> edition) (BSID) at 1 and 2 years, VHEMBE study, Limpopo, South Africa.

**Figure S2.** Bivariate relationships of chemical exposures in the relationship between DDT/pyrethroid insecticides and children's performance on the Cognitive subscale of the Bayley Scales of Infant Assessment (3<sup>rd</sup> edition) (BSID) at 1 year, VHEMBE study, Limpopo, South Africa.

**Figure S3.** Bivariate relationships of chemical exposures in the relationship between DDT/pyrethroid insecticides and children's performance on the Expressive Communication scale of the Bayley Scales of Infant Assessment (3<sup>rd</sup> edition) (BSID) at 1 year, VHEMBE study, Limpopo, South Africa.

**Figure S4.** Bivariate relationships of chemical exposures in the relationship between DDT/pyrethroid insecticides and children's performance on the Receptive Communication subscale of the Bayley Scales of Infant Assessment (3<sup>rd</sup> edition) (BSID) at 1 year, VHEMBE study, Limpopo, South Africa.

**Figure S5.** Bivariate relationships of chemical exposures in the relationship between DDT/pyrethroid insecticides and children's performance on the Fine Motor subscale of the Bayley Scales of Infant Assessment (3<sup>rd</sup> edition) (BSID) at 1 year, VHEMBE study, Limpopo, South Africa.

**Figure S6.** Bivariate relationships of chemical exposures in the relationship between DDT/pyrethroid insecticides and children's performance on the Gross Motor subscale of the Bayley Scales of Infant Assessment (3<sup>rd</sup> edition) (BSID) at 1 year, VHEMBE study, Limpopo, South Africa.

**Figure S7.** Bivariate relationships of chemical exposures in the relationship between DDT/pyrethroid insecticides and children's performance on the Language Composite scale of the Bayley Scales of Infant Assessment (3<sup>rd</sup> edition) (BSID) at 1 year, VHEMBE study, Limpopo, South Africa.

**Figure S8.** Bivariate relationships of chemical exposures in the relationship between DDT/pyrethroid insecticides and children's performance on the Motor Composite scale of the Bayley Scales of Infant Assessment (3<sup>rd</sup> edition) (BSID) at 1 year, VHEMBE study, Limpopo, South Africa.

**Figure S9.** Bivariate relationships of chemical exposures in the relationship between DDT/pyrethroid insecticides and children's performance on the Bayley Social-Emotional subscale of the Bayley Scales of Infant Assessment (3<sup>rd</sup> edition) (BSID) at 1 year, VHEMBE study, Limpopo, South Africa.

**Figure S10.** Bivariate relationships of chemical exposures in the relationship between DDT/pyrethroid insecticides and children's performance on the Cognitive subscale of the Bayley Scales of Infant Assessment (3<sup>rd</sup> edition) (BSID) at 2 years, VHEMBE study, Limpopo, South Africa.

**Figure S11.** Bivariate relationships of chemical exposures in the relationship between DDT/pyrethroid insecticides and children's performance on the Expressive Communication subscale of the Bayley Scales of Infant Assessment (3<sup>rd</sup> edition) (BSID) at 2 years, VHEMBE study, Limpopo, South Africa.

**Figure S12.** Bivariate relationships of chemical exposures in the relationship between DDT/pyrethroid insecticides and children's performance on the Receptive Communication subscale of the Bayley Scales of Infant Assessment (3<sup>rd</sup> edition) (BSID) at 2 years, VHEMBE study, Limpopo, South Africa.

**Figure S13.** Bivariate relationships of chemical exposures in the relationship between DDT/pyrethroid insecticides and children's performance on the Fine Motor subscale of the Bayley Scales of Infant Assessment (3<sup>rd</sup> edition) (BSID) at 2 years, VHEMBE study, Limpopo, South Africa.

**Figure S14.** Bivariate relationships of chemical exposures in the relationship between DDT/pyrethroid insecticides and children's performance on the Gross Motor subscale of the Bayley Scales of Infant Assessment (3<sup>rd</sup> edition) (BSID) at 2 years, VHEMBE study, Limpopo, South Africa.

**Figure S15.** Bivariate relationships of chemical exposures in the relationship between DDT/pyrethroid insecticides and children's performance on the Language Composite scale of the Bayley Scales of Infant Assessment (3<sup>rd</sup> edition) (BSID) at 2 years, VHEMBE study, Limpopo, South Africa.

**Figure S16.** Bivariate relationships of chemical exposures in the relationship between DDT/pyrethroid insecticides and children's performance on the Motor Composite scale of the Bayley Scales of Infant Assessment (3<sup>rd</sup> edition) (BSID) at 2 years, VHEMBE study, Limpopo, South Africa.

**Table S1.** Wet weight (ug/L) and creatinine-adjusted (g/L) maternal urinary concentrations of pyrethroid metabolites, VHEMBE study, Limpopo South Africa.

| Pyrethroid metabolite                     | n   | % Detected <sup>a</sup> | % Quantifiable <sup>b</sup> | Geo. Mean | ± GSD  | Min   | Percentile |       |       |       |       | Max     |
|-------------------------------------------|-----|-------------------------|-----------------------------|-----------|--------|-------|------------|-------|-------|-------|-------|---------|
|                                           |     |                         |                             |           |        |       | 10         | 25    | 50    | 75    | 90    |         |
| <b>Wet Weight Concentrations</b>          |     |                         |                             |           |        |       |            |       |       |       |       |         |
| <i>cis</i> -DBCA                          | 695 | 100                     | 99.6                        | 0.227     | ± 3.42 | 0.005 | 0.050      | 0.099 | 0.226 | 0.483 | 1.141 | 18.416  |
| <i>cis</i> -DCCA                          | 695 | 100                     | 99.9                        | 0.312     | ± 2.96 | 0.015 | 0.085      | 0.154 | 0.305 | 0.611 | 1.058 | 104.744 |
| <i>trans</i> -DCCA                        | 695 | 100                     | 99.6                        | 0.364     | ± 3.44 | 0.008 | 0.079      | 0.161 | 0.347 | 0.805 | 1.526 | 134.473 |
| 3-PBA                                     | 694 | 100                     | 100                         | 0.724     | ± 2.81 | 0.022 | 0.215      | 0.380 | 0.711 | 1.397 | 2.434 | 59.724  |
| 4-F-3 PBA                                 | 672 | 12.5                    | 7.7                         | N/A       |        | <LOD  | <LOD       | <LOD  | <LOD  | <LOD  | 0.008 | 0.431   |
| <b>Creatinine-Adjusted Concentrations</b> |     |                         |                             |           |        |       |            |       |       |       |       |         |
| <i>cis</i> -DBCA                          | 695 | 100                     | 99.6                        | 0.181     | ± 3.08 | 0.008 | 0.044      | 0.075 | 0.167 | 0.377 | 0.834 | 8.213   |
| <i>cis</i> -DCCA                          | 695 | 100                     | 99.9                        | 0.248     | ± 2.51 | 0.034 | 0.086      | 0.137 | 0.234 | 0.400 | 0.726 | 171.788 |
| <i>trans</i> -DCCA                        | 695 | 100                     | 99.6                        | 0.289     | ± 3.04 | 0.017 | 0.074      | 0.142 | 0.272 | 0.527 | 1.098 | 220.545 |
| 3-PBA                                     | 694 | 100                     | 100                         | 0.576     | ± 2.35 | 0.047 | 0.211      | 0.339 | 0.541 | 0.937 | 1.559 | 74.151  |
| 4-F-3 PBA                                 | 672 | 12.5                    | 7.7                         | N/A       |        | <LOD  | <LOD       | <LOD  | <LOD  | <LOD  | 0.009 | 0.293   |

GSD = Geometric Standard Deviation

<sup>a</sup>Detection limits are 0.0025 ug/L for *cis*-DBCA, 0.0045 ug/L for *cis*-DCCA, 0.0038 ug/L for *trans*-DCCA, 0.0047 ug/L for 3-PBA, and 0.005 ug/L for 4-F-3 PBA.

<sup>b</sup>Quantification limits are 0.0082 ug/L for *cis*-DBCA, 0.015 ug/L for *cis*-DCCA, 0.013 ug/L for *trans*-DCCA, 0.016 ug/L for 3-PBA, and 0.011ug/L for 4-F-3 PBA.

**Table S2.** Pearson correlation coefficients for maternal serum concentrations of *p,p'*-DDT and *p,p'*-DDE (log<sub>10</sub> transformed; lipid-adjusted), and urinary concentrations of pyrethroid metabolites (log<sub>10</sub> transformed; specific-gravity adjusted), VHEMBE study (n=705), Limpopo South Africa.

| Compound           | <i>p,p'</i> -DDT | <i>p,p'</i> -DDE | <i>cis</i> -DBCA | <i>cis</i> -DCCA | <i>trans</i> -DCCA | 3PBA           |
|--------------------|------------------|------------------|------------------|------------------|--------------------|----------------|
| <i>p,p'</i> -DDT   | -                | 0.85 (p<0.001)   | 0.02 (p=0.54)    | 0.04 (p=0.29)    | 0.02 (p=0.53)      | 0.04 (p=0.24)  |
| <i>p,p'</i> -DDE   | -                | -                | -0.03 (p=0.48)   | 0.03 (p=0.49)    | 0.02 p=(0.65)      | 0.03 (p=0.48)  |
| <i>cis</i> -DBCA   | -                | -                | -                | 0.46 (p<0.001)   | 0.47 (p<0.001)     | 0.62 (p<0.001) |
| <i>cis</i> -DCCA   | -                | -                | -                | -                | 0.90 (p<0.001)     | 0.88 (p<0.001) |
| <i>trans</i> -DCCA | -                | -                | -                | -                | -                  | 0.87 (p<0.001) |

**Table S3.** Adjusted linear regression  $\beta$  coefficient and 95% confidence interval (CI) for the association between maternal urinary pyrethroid metabolite concentrations measured before delivery only (specific gravity-adjusted) and children's performance on the Bayley Scales of Infant Assessment (3<sup>rd</sup> edition) (BSID) at 1 and 2 years, VHEMBE study, Limpopo, South Africa.

| BSID Measure              | <i>cis</i> -DBCA<br>$\beta$ (95% CI) | <i>cis</i> -DCCA<br>$\beta$ (95% CI) | <i>trans</i> -DCCA<br>$\beta$ (95% CI) | 3PBA<br>$\beta$ (95% CI) |
|---------------------------|--------------------------------------|--------------------------------------|----------------------------------------|--------------------------|
| <b>At 1 Year (n=425)</b>  |                                      |                                      |                                        |                          |
| Cognitive                 | -0.02 (-0.41, 0.38)                  | -0.23 (-0.60, 0.14)                  | -0.19 (-0.51, 0.12)                    | -0.21 (-0.59, 0.17)      |
| Receptive Communication   | 0.13 (-0.17, 0.43)                   | -0.03 (-0.36, 0.29)                  | -0.11 (-0.41, 0.20)                    | -0.06 (-0.41, 0.30)      |
| Expressive Communication  | -0.23 (-0.61, 0.15)                  | -0.20 (-0.56, 0.17)                  | -0.20 (-0.51, 0.11)                    | -0.19 (-0.55, 0.18)      |
| Fine Motor                | -0.13 (-0.54, 0.28)                  | -0.47 (-0.86, -0.07)*                | -0.42 (-0.80, -0.04)*                  | -0.43 (-0.84, -0.01)*    |
| Gross Motor               | 0.07 (-0.43, 0.57)                   | 0.03 (-0.46, 0.53)                   | 0.03 (-0.42, 0.48)                     | 0.06 (-0.46, 0.58)       |
| Language Composite        | -0.32 (-1.84, 1.20)                  | -0.70 (-2.23, 0.84)                  | -0.87 (-2.21, 0.47)                    | -0.72 (-2.31, 0.87)      |
| Motor Composite           | -0.19 (-2.28, 1.91)                  | -1.30 (-3.39, 0.80)                  | -1.15 (-3.14, 0.84)                    | -1.09 (-3.30, 1.12)      |
| Social-Emotional          | -0.11 (-0.68, 0.46)                  | -0.52 (-1.18, 0.13)                  | -0.45 (-1.02, 0.12)                    | -0.53 (-1.20, 0.13)      |
| <b>At 2 Years (n=418)</b> |                                      |                                      |                                        |                          |
| Cognitive                 | -0.20 (-0.47, 0.07)                  | -0.29 (-0.64, 0.06)                  | -0.28 (-0.58, 0.03)                    | -0.29 (-0.61, 0.04)      |
| Receptive Communication   | -0.31 (-0.62, -0.01)*                | -0.10 (-0.45, 0.25)                  | -0.24 (-0.54, 0.06)                    | -0.18 (-0.53, 0.18)      |
| Expressive Communication  | -0.61 (-1.04, -0.17)*                | -0.31 (-0.81, 0.19)                  | -0.53 (-0.96, -0.10)*                  | -0.42 (-0.95, 0.10)      |
| Fine Motor                | -0.05 (-0.36, 0.26)                  | 0.13 (-0.23, 0.48)                   | 0.10 (-0.22, 0.42)                     | 0.12 (-0.26, 0.49)       |
| Gross Motor               | -0.32 (-0.61, -0.04)*                | -0.06 (-0.42, 0.29)                  | -0.11 (-0.42, 0.19)                    | -0.05 (-0.42, 0.32)      |
| Language Composite        | -2.64 (-4.57, -0.71)*                | -1.19 (-3.46, 1.08)                  | -2.23 (-4.17, -0.29)*                  | -1.74 (-4.08, 0.61)      |
| Motor Composite           | -1.15 (-2.55, 0.26)                  | 0.18 (-1.50, 1.86)                   | -0.04 (-1.54, 1.47)                    | 0.19 (-1.59, 1.97)       |

Coefficients show the change in scaled BSID score associated with a 10-fold increase in in maternal urinary pyrethroid metabolite concentrations. Models adjusted for maternal education, age, marital status, poverty status at delivery, risk for depression (CES-D) and Raven's Coloured Progressive Matrices score (at 1-year visit); food insecurity (USD food security survey); HOME score; preterm delivery; psychometrician at the time of exam; and urine sample collection before or after delivery.

\*  $p < 0.05$

**Table S4.** Adjusted linear regression  $\beta$  coefficient and 95% confidence interval (CI) for the association between maternal prenatal  $p,p'$ -DDT and  $p,p'$ -DDE serum concentrations ( $\log_{10}$  transformed; lipid-adjusted) and children's performance on the Bayley Scales of Infant Assessment (BSID) (3<sup>rd</sup> edition) at 1 and 2 years, VHEMBE study, Limpopo, South Africa.

Sensitivity analysis: Preterm births removed as a covariate in the models.

| BSID Measure                  | $p,p'$ -DDT<br>$\beta$ (95% CI) | $p,p'$ -DDE<br>$\beta$ (95% CI) |
|-------------------------------|---------------------------------|---------------------------------|
| At 1 Year (n=689)             |                                 |                                 |
| Cognitive                     | 0.15 (-0.02, 0.33)              | 0.24 (0.05, 0.43)*              |
| Receptive Communication       | -0.02 (-0.17, 0.13)             | 0.00 (-0.19, 0.19)              |
| Expressive Communication      | -0.09 (-0.26, 0.09)             | -0.04 (-0.25, 0.18)             |
| Fine Motor                    | -0.02 (-0.24, 0.19)             | 0.04 (-0.19, 0.27)              |
| Gross Motor                   | 0.11 (-0.12, 0.35)              | 0.08 (-0.20, 0.36)              |
| Language Composite            | -0.33 (-1.11, 0.45)             | -0.12 (-1.09, 0.85)             |
| Motor Composite               | 0.24 (-0.83, 1.31)              | 0.35 (-0.89, 1.59)              |
| Social-Emotional <sup>a</sup> | 0.08 (-0.21, 0.36)              | 0.25 (-0.09, 0.59)              |
| At 2 years (n=681)            |                                 |                                 |
| Cognitive                     | -0.04 (-0.19, 0.10)             | 0.05 (-0.13, 0.24)              |
| Receptive Communication       | 0.00 (-0.14, 0.15)              | 0.03 (-0.15, 0.22)              |
| Expressive Communication      | -0.05 (-0.27, 0.17)             | 0.06 (-0.23, 0.35)              |
| Fine Motor                    | -0.08 (-0.24, 0.09)             | 0.02 (-0.19, 0.22)              |
| Gross Motor                   | 0.02 (-0.11, 0.16)              | 0.06 (-0.10, 0.23)              |
| Language Composite            | -0.12 (-1.07, 0.83)             | 0.30 (-0.92, 1.52)              |
| Motor Composite               | -0.16 (-0.91, 0.58)             | 0.23 (-0.68, 1.13)              |

Coefficients show the change in scaled BSID score associated with a 10-fold increase in maternal DDT/E serum concentrations. Models adjusted for maternal education, age, marital status, poverty status at delivery, risk for depression (CES-D) and Raven's Coloured Progressive Matrices score (at 1-year visit); food insecurity (USD food security survey); HOME score; and psychometrician.

<sup>a</sup>Models include 696 participants.

\*  $p < 0.05$



**Table S5.** Adjusted linear regression  $\beta$  coefficient and 95% confidence interval (CI) for the association between maternal prenatal urinary pyrethroid metabolite concentration (specific gravity-adjusted) and children's performance on the Bayley Scales of Infant Assessment (3<sup>rd</sup> edition) (BSID) at 1 and 2 years, VHEMBE study, Limpopo, South Africa.

Sensitivity analysis: Preterm births removed as a covariate in the models.

| BSID Measure                  | <i>cis</i> -DBCA<br>$\beta$ (95% CI) | <i>cis</i> -DCCA<br>$\beta$ (95% CI) | <i>trans</i> -DCCA<br>$\beta$ (95% CI) | 3PBA <sup>a</sup><br>$\beta$ (95% CI) |
|-------------------------------|--------------------------------------|--------------------------------------|----------------------------------------|---------------------------------------|
| At 1 year (n=681)             |                                      |                                      |                                        |                                       |
| Cognitive                     | 0.05 (-0.26, 0.36)                   | 0.01 (-0.30, 0.33)                   | 0.02 (-0.25, 0.30)                     | 0.03 (-0.31, 0.37)                    |
| Receptive Communication       | 0.13 (-0.12, 0.38)                   | 0.04 (-0.24, 0.33)                   | -0.02 (-0.28, 0.24)                    | 0.09 (-0.22, 0.41)                    |
| Expressive Communication      | -0.21 (-0.50, 0.08)                  | -0.06 (-0.35, 0.23)                  | -0.09 (-0.34, 0.16)                    | -0.10 (-0.41, 0.20)                   |
| Fine Motor                    | 0.09 (-0.25, 0.42)                   | -0.08 (-0.47, 0.30)                  | -0.07 (-0.42, 0.27)                    | -0.01 (-0.41, 0.40)                   |
| Gross Motor                   | 0.10 (-0.29, 0.50)                   | 0.36 (-0.10, 0.81)                   | 0.24 (-0.17, 0.64)                     | 0.27 (-0.21, 0.76)                    |
| Language Composite            | -0.26 (-1.50, 0.99)                  | -0.08 (-1.39, 1.23)                  | -0.31 (-1.47, 0.85)                    | -0.06 (-1.47, 1.35)                   |
| Motor Composite               | 0.59 (-1.15, 2.33)                   | 0.84 (-1.22, 2.90)                   | 0.52 (-1.33, 2.36)                     | 0.82 (-1.35, 2.98)                    |
| Social-Emotional <sup>b</sup> | -0.19 (-0.64, 0.26)                  | -0.63 (-1.14, -0.12)*                | -0.48 (-0.92, -0.04)*                  | -0.58 (-1.10, -0.05)*                 |
| At 2 years (n=671)            |                                      |                                      |                                        |                                       |
| Cognitive                     | -0.01 (-0.24, 0.22)                  | 0.03 (-0.27, 0.34)                   | -0.03 (-0.29, 0.24)                    | 0.04 (-0.26, 0.33)                    |
| Receptive Communication       | -0.21 (-0.45, 0.03)                  | 0.07 (-0.21, 0.35)                   | -0.10 (-0.34, 0.15)                    | -0.07 (-0.36, 0.23)                   |
| Expressive Communication      | -0.40 (-0.76, -0.03)*                | 0.00 (-0.41, 0.41)                   | -0.24 (-0.59, 0.12)                    | -0.23 (-0.67, 0.21)                   |
| Fine Motor                    | 0.16 (-0.12, 0.43)                   | 0.31 (-0.02, 0.64)                   | 0.18 (-0.12, 0.47)                     | 0.31 (-0.04, 0.65)                    |
| Gross Motor                   | -0.19 (-0.43, 0.05)                  | 0.08 (-0.22, 0.38)                   | -0.05 (-0.31, 0.22)                    | 0.03 (-0.30, 0.36)                    |
| Language Composite            | -1.72 (-3.33, -0.11)*                | 0.23 (-1.62, 2.07)                   | -0.95 (-2.55, 0.65)                    | -0.82 (-2.78, 1.15)                   |
| Motor Composite               | -0.11 (-1.38, 1.16)                  | 1.19 (-0.38, 2.76)                   | 0.39 (-1.02, 1.80)                     | 0.99 (-0.68, 2.66)                    |

Coefficients show the change in scaled BSID score associated with a 10-fold increase in in maternal urinary pyrethroid metabolite concentrations. Models adjusted for maternal education, age, marital status, poverty status at delivery, risk for depression (CES-D) and Raven's Coloured Progressive Matrices score (at 1-year visit); food insecurity (USD food security survey); HOME score; preterm delivery; psychometrician; and time of urine collection (before or after delivery).

<sup>a</sup> Due to 1 missing value, models with 3PBA had 680 participants at 1 year and 670 participants at 2 years.

<sup>b</sup> Social-Emotional outcome models had 688 participants for *cis*-DBCA, *cis*-DCCA, and *trans*-DCCA exposures, and 687 participants for 3PBA.

\*  $p < 0.05$

**Table S6.** Adjusted linear regression  $\beta$  coefficient and 95% confidence interval (CI) for the association between maternal prenatal *p,p'*-DDT and *p,p'*-DDE serum concentrations ( $\log_{10}$  transformed; lipid-adjusted) and children's performance on the Bayley Scales of Infant Assessment (BSID) (3<sup>rd</sup> edition) at 1 and 2 years, VHEMBE study, Limpopo, South Africa.

Sensitivity analysis: Maternal HIV status included in models.

| BSID Measure                  | <i>p,p'</i> -DDT<br>$\beta$ (95% CI) | <i>p,p'</i> -DDE<br>$\beta$ (95% CI) |
|-------------------------------|--------------------------------------|--------------------------------------|
| At 1 Year (n=687)             |                                      |                                      |
| Cognitive                     | 0.16 (-0.02, 0.33)                   | 0.24 (0.05, 0.43)*                   |
| Receptive Communication       | -0.02 (-0.17, 0.13)                  | 0.00 (-0.19, 0.19)                   |
| Expressive Communication      | -0.09 (-0.27, 0.09)                  | -0.04 (-0.26, 0.17)                  |
| Fine Motor                    | -0.02 (-0.23, 0.20)                  | 0.05 (-0.19, 0.28)                   |
| Gross Motor                   | 0.11 (-0.12, 0.35)                   | 0.08 (-0.20, 0.36)                   |
| Language Composite            | -0.32 (-1.11, 0.46)                  | -0.13 (-1.10, 0.84)                  |
| Motor Composite               | 0.26 (-0.82, 1.33)                   | 0.37 (-0.87, 1.62)                   |
| Social-Emotional <sup>a</sup> | 0.08 (-0.20, 0.37)                   | 0.25 (-0.09, 0.59)                   |
| At 2 years (n=678)            |                                      |                                      |
| Cognitive                     | -0.04 (-0.19, 0.10)                  | 0.05 (-0.13, 0.23)                   |
| Receptive Communication       | 0.00 (-0.14, 0.15)                   | 0.03 (-0.15, 0.22)                   |
| Expressive Communication      | -0.06 (-0.28, 0.16)                  | 0.06 (-0.23, 0.34)                   |
| Fine Motor                    | -0.07 (-0.24, 0.10)                  | 0.02 (-0.19, 0.23)                   |
| Gross Motor                   | 0.03 (-0.11, 0.16)                   | 0.06 (-0.11, 0.23)                   |
| Language Composite            | -0.15 (-1.10, 0.80)                  | 0.28 (-0.94, 1.51)                   |
| Motor Composite               | -0.14 (-0.88, 0.60)                  | 0.23 (-0.68, 1.14)                   |

Coefficients show the change in scaled BSID score associated with a 10-fold increase in maternal DDT/E serum concentrations. Models adjusted for maternal education, age, marital status, HIV status, and poverty status at delivery, risk for depression (CES-D) and Raven's Coloured Progressive Matrices score (at 1-year visit); food insecurity (USD food security survey); HOME score; preterm delivery; and psychometrician.

<sup>a</sup>Models include 646 participants.

\* $p < 0.05$

**Table S7.** Adjusted linear regression  $\beta$  coefficient and 95% confidence interval (CI) for the association between maternal prenatal urinary pyrethroid metabolite concentration (specific gravity-adjusted) and children's performance on the Bayley Scales of Infant Assessment (3<sup>rd</sup> edition) (BSID) at 1 and 2 years, VHEMBE study, Limpopo, South Africa.

Sensitivity analysis: Maternal HIV status included in models.

| BSID Measure                  | <i>cis</i> -DBCA<br>$\beta$ (95% CI) | <i>cis</i> -DCCA<br>$\beta$ (95% CI) | <i>trans</i> -DCCA<br>$\beta$ (95% CI) | 3PBA <sup>a</sup><br>$\beta$ (95% CI) |
|-------------------------------|--------------------------------------|--------------------------------------|----------------------------------------|---------------------------------------|
| At 1 year (n=679)             |                                      |                                      |                                        |                                       |
| Cognitive                     | 0.05 (-0.26, 0.36)                   | 0.01 (-0.30, 0.33)                   | 0.02 (-0.26, 0.30)                     | 0.03 (-0.31, 0.38)                    |
| Receptive Communication       | 0.13 (-0.12, 0.38)                   | 0.04 (-0.24, 0.32)                   | -0.03 (-0.29, 0.23)                    | 0.08 (-0.24, 0.39)                    |
| Expressive Communication      | -0.20 (-0.50, 0.10)                  | -0.06 (-0.36, 0.23)                  | -0.09 (-0.34, 0.16)                    | -0.11 (-0.41, 0.20)                   |
| Fine Motor                    | 0.08 (-0.26, 0.42)                   | -0.08 (-0.46, 0.31)                  | -0.07 (-0.42, 0.27)                    | 0.00 (-0.40, 0.41)                    |
| Gross Motor                   | 0.13 (-0.27, 0.52)                   | 0.35 (-0.11, 0.81)                   | 0.23 (-0.17, 0.64)                     | 0.27 (-0.22, 0.75)                    |
| Language Composite            | -0.23 (-1.48, 1.02)                  | -0.09 (-1.39, 1.22)                  | -0.34 (-1.49, 0.82)                    | -0.12 (-1.52, 1.29)                   |
| Motor Composite               | 0.63 (-1.12, 2.39)                   | 0.83 (-1.23, 2.89)                   | 0.50 (-1.35, 2.34)                     | 0.83 (-1.34, 2.99)                    |
| Social-Emotional <sup>b</sup> | -0.17 (-0.61, 0.28)                  | -0.64 (-1.14, -0.13)*                | -0.49 (-0.93, -0.06)*                  | -0.60 (-1.13, -0.08)*                 |
| At 2 years (n=669)            |                                      |                                      |                                        |                                       |
| Cognitive                     | 0.00 (-0.23, 0.23)                   | 0.04 (-0.27, 0.34)                   | -0.02 (-0.29, 0.24)                    | 0.05 (-0.25, 0.35)                    |
| Receptive Communication       | -0.21 (-0.45, 0.04)                  | 0.07 (-0.21, 0.36)                   | -0.09 (-0.34, 0.15)                    | -0.05 (-0.35, 0.25)                   |
| Expressive Communication      | -0.41 (-0.77, -0.04)*                | 0.01 (-0.40, 0.42)                   | -0.22 (-0.58, 0.13)                    | -0.22 (-0.66, 0.22)                   |
| Fine Motor                    | 0.16 (-0.12, 0.44)                   | 0.31 (-0.02, 0.64)                   | 0.17 (-0.13, 0.47)                     | 0.30 (-0.05, 0.65)                    |
| Gross Motor                   | -0.17 (-0.42, 0.07)                  | 0.08 (-0.22, 0.38)                   | -0.05 (-0.31, 0.22)                    | 0.03 (-0.30, 0.36)                    |
| Language Composite            | -1.74 (-3.35, -0.12)*                | 0.24 (-1.61, 2.09)                   | -0.90 (-2.50, 0.70)                    | -0.75 (-2.72, 1.21)                   |
| Motor Composite               | -0.07 (-1.35, 1.21)                  | 1.18 (-0.39, 2.75)                   | 0.36 (-1.04, 1.76)                     | 0.98 (-0.69, 2.65)                    |

Coefficients show the change in scaled BSID score associated with a 10-fold increase in in maternal urinary pyrethroid metabolite concentrations. Models adjusted for maternal education, age, marital status, HIV status, and poverty status at delivery, risk for depression (CES-D) and Raven's Coloured Progressive Matrices score (at 1-year visit); food insecurity (USD food security survey); HOME score; preterm delivery; psychometrician; and time of urine collection (before or after delivery).

<sup>a</sup> Due to 1 missing value, models with 3PBA had 678 participants at 1 year and 668 participants at 2 years.

<sup>b</sup> Social-Emotional outcome models had 688 participants for *cis*-DBCA, *cis*-DCCA, and *trans*-DCCA exposures, and 687 participants for 3PBA.

\*  $p < 0.05$

**Table S8.** Adjusted linear regression  $\beta$  coefficient and 95% confidence interval (CI) for the association between maternal prenatal *p,p'*-DDT and *p,p'*-DDE serum concentrations ( $\log_{10}$  transformed; lipid-adjusted) and children's performance on the Bayley Scales of Infant Assessment (BSID) (3<sup>rd</sup> edition) at 1 and 2 years, VHEMBE study, Limpopo, South Africa.

Sensitivity analysis: Restricted to subset of children with blood lead measurements; child blood lead controlled for in models.

| BSID Measure                  | <i>p,p'</i> -DDT<br>$\beta$ (95% CI) | <i>p,p'</i> -DDE<br>$\beta$ (95% CI) |
|-------------------------------|--------------------------------------|--------------------------------------|
| At 1 Year (n=494)             |                                      |                                      |
| Cognitive                     | 0.25 (0.04, 0.45)*                   | 0.23 (-0.01, 0.46)                   |
| Receptive Communication       | -0.08 (-0.26, 0.11)                  | -0.03 (-0.26, 0.19)                  |
| Expressive Communication      | -0.10 (-0.32, 0.11)                  | -0.05 (-0.32, 0.22)                  |
| Fine Motor                    | -0.01 (-0.29, 0.27)                  | 0.07 (-0.23, 0.36)                   |
| Gross Motor                   | 0.19 (-0.08, 0.47)                   | 0.15 (-0.19, 0.49)                   |
| Language Composite            | -0.52 (-1.44, 0.39)                  | -0.24 (-1.40, 0.92)                  |
| Motor Composite               | 0.52 (-0.78, 1.83)                   | 0.63 (-0.92, 2.19)                   |
| Social-Emotional <sup>a</sup> | 0.13 (-0.24, 0.50)                   | 0.25 (-0.19, 0.68)                   |
| At 2 years (n=480)            |                                      |                                      |
| Cognitive                     | -0.02 (-0.20, 0.15)                  | 0.07 (-0.15, 0.29)                   |
| Receptive Communication       | -0.06 (-0.24, 0.13)                  | -0.04 (-0.27, 0.18)                  |
| Expressive Communication      | -0.20 (-0.46, 0.05)                  | -0.16 (-0.50, 0.18)                  |
| Fine Motor                    | -0.08 (-0.29, 0.13)                  | 0.00 (-0.24, 0.25)                   |
| Gross Motor                   | -0.04 (-0.20, 0.12)                  | -0.05 (-0.26, 0.16)                  |
| Language Composite            | -0.74 (-1.89, 0.42)                  | -0.57 (-2.04, 0.90)                  |
| Motor Composite               | -0.36 (-1.28, 0.55)                  | -0.14 (-1.23, 0.95)                  |

Coefficients show the change in scaled BSID score associated with a 10-fold increase in maternal DDT/E serum concentrations. Models adjusted for maternal education, age, marital status, poverty status at delivery, risk for depression (CES-D) and Raven's Coloured Progressive Matrices score (at 1-year visit); food insecurity (USD food security survey); HOME score; preterm delivery; child's blood lead at 1 year; and psychometrician.

<sup>a</sup>Models include 497 participants.

\* $p < 0.05$

**Table S9.** Adjusted linear regression  $\beta$  coefficient and 95% confidence interval (CI) for the association between maternal prenatal *p,p'*-DDT and *p,p'*-DDE serum concentrations ( $\log_{10}$  transformed; lipid-adjusted) and children's performance on the Bayley Scales of Infant Assessment (BSID) (3<sup>rd</sup> edition) at 1 and 2 years, VHEMBE study, Limpopo, South Africa.

Sensitivity analysis: Restricted to subset of children with blood lead measurements; child blood lead levels are not controlled for in models.(for comparison with Table S8).

| BSID Measure                  | <i>p,p'</i> -DDT<br>$\beta$ (95% CI) | <i>p,p'</i> -DDE<br>$\beta$ (95% CI) |
|-------------------------------|--------------------------------------|--------------------------------------|
| At 1 Year (n=494)             |                                      |                                      |
| Cognitive                     | 0.24 (0.04, 0.45)*                   | 0.23 (-0.01, 0.46)                   |
| Receptive Communication       | -0.07 (-0.25, 0.11)                  | -0.03 (-0.25, 0.20)                  |
| Expressive Communication      | -0.10 (-0.31, 0.12)                  | -0.05 (-0.32, 0.22)                  |
| Fine Motor                    | 0.01 (-0.27, 0.29)                   | 0.08 (-0.22, 0.37)                   |
| Gross Motor                   | 0.22 (-0.05, 0.50)                   | 0.17 (-0.18, 0.51)                   |
| Language Composite            | -0.48 (-1.40, 0.44)                  | -0.22 (-1.39, 0.96)                  |
| Motor Composite               | 0.67 (-0.64, 1.97)                   | 0.71 (-0.85, 2.28)                   |
| Social-Emotional <sup>a</sup> | 0.12 (-0.25, 0.49)                   | 0.24 (-0.19, 0.67)                   |
| At 2 years (n=480)            |                                      |                                      |
| Cognitive                     | -0.02 (-0.19, 0.16)                  | 0.08 (-0.15, 0.30)                   |
| Receptive Communication       | -0.04 (-0.23, 0.14)                  | -0.04 (-0.26, 0.19)                  |
| Expressive Communication      | -0.20 (-0.45, 0.06)                  | -0.16 (-0.50, 0.18)                  |
| Fine Motor                    | -0.08 (-0.29, 0.13)                  | 0.00 (-0.24, 0.25)                   |
| Gross Motor                   | -0.03 (-0.19, 0.13)                  | -0.04 (-0.25, 0.16)                  |
| Language Composite            | -0.68 (-1.83, 0.46)                  | -0.55 (-2.01, 0.92)                  |
| Motor Composite               | -0.33 (-1.25, 0.59)                  | -0.13 (-1.22, 0.96)                  |

Coefficients show the change in scaled BSID score associated with a 10-fold increase in maternal DDT/E serum concentrations. Models adjusted for maternal education, age, marital status, poverty status at delivery, risk for depression (CES-D) and Raven's Coloured Progressive Matrices score (at 1-year visit); food insecurity (USD food security survey); HOME score; preterm delivery; and psychometrician.

<sup>a</sup>Models include 497 participants.

\* $p < 0.05$

**Table S10.** Adjusted linear regression  $\beta$  coefficient and 95% confidence interval (CI) for the association between maternal prenatal urinary pyrethroid metabolite concentration (specific gravity-adjusted) and children's performance on the Bayley Scales of Infant Assessment (3<sup>rd</sup> edition) (BSID) at 1 and 2 years, VHEMBE study, Limpopo, South Africa.

Sensitivity analysis: Restricted to subset of children with lead measurements; child lead level controlled for in models.

| BSID Measure                  | <i>cis</i> -DBCA<br>$\beta$ (95% CI) | <i>cis</i> -DCCA<br>$\beta$ (95% CI) | <i>trans</i> -DCCA<br>$\beta$ (95% CI) | 3PBA <sup>a</sup><br>$\beta$ (95% CI) |
|-------------------------------|--------------------------------------|--------------------------------------|----------------------------------------|---------------------------------------|
| At 1 year (n=491)             |                                      |                                      |                                        |                                       |
| Cognitive                     | 0.22 (-0.16, 0.59)                   | 0.02 (-0.37, 0.41)                   | 0.05 (-0.27, 0.38)                     | 0.10 (-0.33, 0.52)                    |
| Receptive Communication       | 0.16 (-0.15, 0.46)                   | -0.07 (-0.43, 0.28)                  | -0.08 (-0.39, 0.24)                    | 0.05 (-0.35, 0.45)                    |
| Expressive Communication      | -0.23 (-0.61, 0.15)                  | -0.10 (-0.45, 0.26)                  | -0.07 (-0.37, 0.23)                    | -0.07 (-0.46, 0.31)                   |
| Fine Motor                    | 0.12 (-0.30, 0.54)                   | 0.00 (-0.47, 0.47)                   | 0.03 (-0.39, 0.44)                     | 0.14 (-0.37, 0.65)                    |
| Gross Motor                   | 0.33 (-0.16, 0.82)                   | 0.59 (0.05, 1.14)*                   | 0.58 (0.10, 1.05)*                     | 0.63 (0.04, 1.21)*                    |
| Language Composite            | -0.22 (-1.76, 1.33)                  | -0.48 (-2.04, 1.08)                  | -0.36 (-1.74, 1.01)                    | -0.06 (-1.82, 1.69)                   |
| Motor Composite               | 1.39 (-0.79, 3.56)                   | 1.82 (-0.70, 4.34)                   | 1.86 (-0.32, 4.05)                     | 2.35 (-0.33, 5.02)                    |
| Social-Emotional <sup>b</sup> | -0.24 (-0.77, 0.29)                  | -0.81 (-1.39, -0.24)*                | -0.62 (-1.12, -0.11)*                  | -0.64 (-1.26, -0.01)*                 |
| At 2 years (n=477)            |                                      |                                      |                                        |                                       |
| Cognitive                     | 0.03 (-0.26, 0.32)                   | 0.11 (-0.27, 0.50)                   | 0.08 (-0.23, 0.40)                     | 0.10 (-0.27, 0.47)                    |
| Receptive Communication       | -0.21 (-0.52, 0.09)                  | 0.11 (-0.23, 0.46)                   | -0.04 (-0.34, 0.26)                    | -0.01 (-0.38, 0.37)                   |
| Expressive Communication      | -0.23 (-0.67, 0.21)                  | 0.15 (-0.36, 0.66)                   | -0.14 (-0.57, 0.29)                    | -0.07 (-0.61, 0.47)                   |
| Fine Motor                    | 0.17 (-0.18, 0.51)                   | 0.37 (-0.02, 0.76)                   | 0.26 (-0.10, 0.61)                     | 0.39 (-0.02, 0.80)                    |
| Gross Motor                   | -0.21 (-0.49, 0.08)                  | 0.08 (-0.28, 0.44)                   | 0.05 (-0.26, 0.37)                     | 0.08 (-0.32, 0.48)                    |
| Language Composite            | -1.26 (-3.24, 0.72)                  | 0.78 (-1.51, 3.07)                   | -0.51 (-2.49, 1.47)                    | -0.18 (-2.62, 2.27)                   |
| Motor Composite               | -0.12 (-1.67, 1.43)                  | 1.36 (-0.58, 3.30)                   | 0.95 (-0.79, 2.70)                     | 1.42 (-0.66, 3.49)                    |

Coefficients show the change in scaled BSID score associated with a 10-fold increase in in maternal urinary pyrethroid metabolite concentrations. Models adjusted for maternal education, age, marital status, poverty status at delivery, risk for depression (CES-D) and Raven's Coloured Progressive Matrices score (at 1-year visit); food insecurity (USD food security survey); HOME score; preterm delivery; child's blood lead at 1 year; psychometrician; and time of urine collection (before or after delivery).

<sup>a</sup> Due to 1 missing value, models with 3PBA had 490 participants at 1 year and 476 participants at 2 years.

<sup>b</sup> Social-Emotional outcome models had 494 participants for *cis*-DBCA, *cis*-DCCA, and *trans*-DCCA exposures, and 493 participants for 3PBA.

\*  $p < 0.05$

**Table S11.** Adjusted linear regression  $\beta$  coefficient and 95% confidence interval (CI) for the association between maternal prenatal urinary pyrethroid metabolite concentration (specific gravity-adjusted) and children's performance on the Bayley Scales of Infant Assessment (3<sup>rd</sup> edition) (BSID) at 1 and 2 years, VHEMBE study, Limpopo, South Africa.

Sensitivity analysis: Restricted to subset of children with lead measurements; child lead level not controlled for in models. (for comparison with Table S10).

| BSID Measure                  | <i>cis</i> -DBCA<br>$\beta$ (95% CI) | <i>cis</i> -DCCA<br>$\beta$ (95% CI) | <i>trans</i> -DCCA<br>$\beta$ (95% CI) | 3PBA <sup>a</sup><br>$\beta$ (95% CI) |
|-------------------------------|--------------------------------------|--------------------------------------|----------------------------------------|---------------------------------------|
| At 1 year (n=491)             |                                      |                                      |                                        |                                       |
| Cognitive                     | 0.22 (-0.16, 0.59)                   | 0.02 (-0.37, 0.41)                   | 0.05 (-0.28, 0.38)                     | 0.09 (-0.33, 0.52)                    |
| Receptive Communication       | 0.16 (-0.15, 0.47)                   | -0.07 (-0.42, 0.29)                  | -0.07 (-0.39, 0.25)                    | 0.05 (-0.35, 0.46)                    |
| Expressive Communication      | -0.23 (-0.61, 0.15)                  | -0.09 (-0.45, 0.26)                  | -0.06 (-0.36, 0.24)                    | -0.07 (-0.45, 0.31)                   |
| Fine Motor                    | 0.13 (-0.30, 0.55)                   | 0.01 (-0.46, 0.48)                   | 0.04 (-0.37, 0.46)                     | 0.15 (-0.36, 0.67)                    |
| Gross Motor                   | 0.34 (-0.15, 0.82)                   | 0.62 (0.07, 1.16)*                   | 0.61 (0.13, 1.08)*                     | 0.65 (0.07, 1.23)*                    |
| Language Composite            | -0.21 (-1.76, 1.34)                  | -0.44 (-2.01, 1.12)                  | -0.32 (-1.70, 1.06)                    | -0.03 (-1.80, 1.73)                   |
| Motor Composite               | 1.41 (-0.77, 3.59)                   | 1.92 (-0.60, 4.45)                   | 1.99 (-0.21, 4.19)                     | 2.44 (-0.25, 5.13)                    |
| Social-Emotional <sup>b</sup> | -0.24 (-0.78, 0.29)                  | -0.82 (-1.39, -0.24)*                | -0.62 (-1.13, -0.12)*                  | -0.64 (-1.27, -0.02)*                 |
| At 2 years (n=477)            |                                      |                                      |                                        |                                       |
| Cognitive                     | 0.03 (-0.26, 0.32)                   | 0.12 (-0.26, 0.50)                   | 0.09 (-0.23, 0.41)                     | 0.11 (-0.26, 0.48)                    |
| Receptive Communication       | -0.21 (-0.51, 0.10)                  | 0.12 (-0.22, 0.47)                   | -0.03 (-0.33, 0.27)                    | 0.01 (-0.37, 0.38)                    |
| Expressive Communication      | -0.23 (-0.67, 0.21)                  | 0.16 (-0.36, 0.67)                   | -0.13 (-0.57, 0.30)                    | -0.06 (-0.60, 0.48)                   |
| Fine Motor                    | 0.17 (-0.18, 0.51)                   | 0.37 (-0.03, 0.76)                   | 0.25 (-0.11, 0.61)                     | 0.38 (-0.03, 0.80)                    |
| Gross Motor                   | -0.20 (-0.48, 0.08)                  | 0.09 (-0.27, 0.45)                   | 0.07 (-0.25, 0.39)                     | 0.09 (-0.31, 0.49)                    |
| Language Composite            | -1.23 (-3.22, 0.75)                  | 0.83 (-1.47, 3.12)                   | -0.45 (-2.44, 1.53)                    | -0.13 (-2.57, 2.32)                   |
| Motor Composite               | -0.11 (-1.67, 1.45)                  | 1.38 (-0.56, 3.33)                   | 0.98 (-0.78, 2.74)                     | 1.44 (-0.64, 3.52)                    |

Coefficients show the change in scaled BSID score associated with a 10-fold increase in in maternal urinary pyrethroid metabolite concentrations. Models adjusted for maternal education, age, marital status, poverty status at delivery, risk for depression (CES-D) and Raven's Coloured Progressive Matrices score (at 1-year visit); food insecurity (USD food security survey); HOME score; preterm delivery; psychometrician; and time of urine collection (before or after delivery).

<sup>a</sup> Due to 1 missing value, models with 3PBA had 490 participants at 1 year and 476 participants at 2 years.

<sup>b</sup> Social-Emotional outcome models had 494 participants for *cis*-DBCA, *cis*-DCCA, and *trans*-DCCA exposures, and 493 participants for 3PBA.

\*  $p < 0.05$

**Table S12.** Adjusted linear regression  $\beta$  coefficient and 95% confidence interval (CI) for the association between maternal prenatal  $p,p'$ -DDT and  $p,p'$ -DDE serum concentrations ( $\log_{10}$  transformed; lipid-adjusted) and children's performance on the Bayley Scales of Infant Assessment (BSID) (3<sup>rd</sup> edition) at 1 and 2 years, VHEMBE study, Limpopo, South Africa.

Sensitivity analysis: Restricted to subset of children with hemoglobin measurements at 1-year; child hemoglobin level controlled for in models.

| BSID Measure                  | $p,p'$ -DDT<br>$\beta$ (95% CI) | $p,p'$ -DDE<br>$\beta$ (95% CI) |
|-------------------------------|---------------------------------|---------------------------------|
| At 1 Year (n=570)             |                                 |                                 |
| Cognitive                     | 0.16 (-0.04, 0.35)              | 0.19 (-0.02, 0.40)              |
| Receptive Communication       | -0.05 (-0.21, 0.11)             | -0.04 (-0.25, 0.16)             |
| Expressive Communication      | -0.12 (-0.32, 0.08)             | -0.08 (-0.33, 0.17)             |
| Fine Motor                    | -0.04 (-0.29, 0.21)             | -0.01 (-0.28, 0.26)             |
| Gross Motor                   | 0.17 (-0.10, 0.43)              | 0.12 (-0.19, 0.43)              |
| Language Composite            | -0.52 (-1.37, 0.33)             | -0.36 (-1.43, 0.72)             |
| Motor Composite               | 0.34 (-0.89, 1.58)              | 0.33 (-1.11, 1.76)              |
| Social-Emotional <sup>a</sup> | 0.02 (-0.30, 0.34)              | 0.13 (-0.26, 0.51)              |
| At 2 years (n=553)            |                                 |                                 |
| Cognitive                     | -0.07 (-0.24, 0.09)             | 0.02 (-0.19, 0.23)              |
| Receptive Communication       | -0.04 (-0.21, 0.12)             | -0.04 (-0.24, 0.17)             |
| Expressive Communication      | -0.20 (-0.44, 0.03)             | -0.13 (-0.46, 0.20)             |
| Fine Motor                    | -0.09 (-0.28, 0.10)             | 0.00 (-0.24, 0.23)              |
| Gross Motor                   | 0.01 (-0.14, 0.16)              | 0.02 (-0.16, 0.21)              |
| Language Composite            | -0.70 (-1.75, 0.35)             | -0.47 (-1.85, 0.92)             |
| Motor Composite               | -0.24 (-1.06, 0.59)             | 0.06 (-0.96, 1.07)              |

Coefficients show the change in scaled BSID score associated with a 10-fold increase in maternal DDT/E serum concentrations. Models adjusted for maternal education, age, marital status, poverty status at delivery, risk for depression (CES-D) and Raven's Coloured Progressive Matrices score (at 1-year visit); food insecurity (USD food security survey); HOME score; preterm delivery; child hemoglobin at 1 year; and psychometrician.

<sup>a</sup>Models include 573 participants.



**Table S13.** Adjusted linear regression  $\beta$  coefficient and 95% confidence interval (CI) for the association between maternal prenatal  $p,p'$ -DDT and  $p,p'$ -DDE serum concentrations ( $\log_{10}$  transformed; lipid-adjusted) and children's performance on the Bayley Scales of Infant Assessment (BSID) (3<sup>rd</sup> edition) at 1 and 2 years, VHEMBE study, Limpopo, South Africa.

Sensitivity analysis: Restricted to subset of children with hemoglobin measurements at 1-year; child hemoglobin level not controlled for in models. (for comparison to Table S12).

| BSID Measure                  | $p,p'$ -DDT<br>$\beta$ (95% CI) | $p,p'$ -DDE<br>$\beta$ (95% CI) |
|-------------------------------|---------------------------------|---------------------------------|
| At 1 Year (n=570)             |                                 |                                 |
| Cognitive                     | 0.16 (-0.04, 0.35)              | 0.19 (-0.02, 0.40)              |
| Receptive Communication       | -0.05 (-0.21, 0.11)             | -0.04 (-0.25, 0.16)             |
| Expressive Communication      | -0.12 (-0.32, 0.08)             | -0.08 (-0.33, 0.17)             |
| Fine Motor                    | -0.04 (-0.29, 0.21)             | -0.01 (-0.28, 0.26)             |
| Gross Motor                   | 0.16 (-0.10, 0.43)              | 0.12 (-0.19, 0.43)              |
| Language Composite            | -0.52 (-1.37, 0.33)             | -0.36 (-1.44, 0.72)             |
| Motor Composite               | 0.34 (-0.89, 1.57)              | 0.32 (-1.12, 1.76)              |
| Social-Emotional <sup>a</sup> | 0.02 (-0.30, 0.35)              | 0.13 (-0.26, 0.52)              |
| At 2 years (n=553)            |                                 |                                 |
| Cognitive                     | -0.08 (-0.24, 0.09)             | 0.02 (-0.19, 0.23)              |
| Receptive Communication       | -0.04 (-0.21, 0.12)             | -0.04 (-0.24, 0.17)             |
| Expressive Communication      | -0.20 (-0.44, 0.03)             | -0.13 (-0.46, 0.20)             |
| Fine Motor                    | -0.09 (-0.28, 0.10)             | 0.00 (-0.23, 0.23)              |
| Gross Motor                   | 0.01 (-0.14, 0.16)              | 0.02 (-0.17, 0.21)              |
| Language Composite            | -0.70 (-1.75, 0.34)             | -0.47 (-1.85, 0.92)             |
| Motor Composite               | -0.24 (-1.07, 0.59)             | 0.06 (-0.96, 1.07)              |

Coefficients show the change in scaled BSID score associated with a 10-fold increase in maternal DDT/E serum concentrations. Models adjusted for maternal education, age, marital status, poverty status at delivery, risk for depression (CES-D) and Raven's Coloured Progressive Matrices score (at 1-year visit); food insecurity (USD food security survey); HOME score; preterm delivery; and psychometrician.

<sup>a</sup> Models include 573 participants.

**Table S14.** Adjusted linear regression  $\beta$  coefficient and 95% confidence interval (CI) for the association between maternal prenatal urinary pyrethroid metabolite concentration (specific gravity-adjusted) and children's performance on the Bayley Scales of Infant Assessment (3<sup>rd</sup> edition) (BSID) at 1 and 2 years, VHEMBE study, Limpopo, South Africa.

Sensitivity analysis: Restricted to subset of children with hemoglobin measurements at 1-year; child hemoglobin level controlled for in models.

| BSID Measure                  | <i>cis</i> -DBCA<br>$\beta$ (95% CI) | <i>cis</i> -DCCA<br>$\beta$ (95% CI) | <i>trans</i> -DCCA<br>$\beta$ (95% CI) | 3PBA <sup>a</sup><br>$\beta$ (95% CI) |
|-------------------------------|--------------------------------------|--------------------------------------|----------------------------------------|---------------------------------------|
| At 1 year (n=567)             |                                      |                                      |                                        |                                       |
| Cognitive                     | 0.14 (-0.21, 0.50)                   | -0.02 (-0.37, 0.33)                  | 0.00 (-0.29, 0.30)                     | 0.05 (-0.33, 0.44)                    |
| Receptive Communication       | 0.18 (-0.10, 0.47)                   | -0.01 (-0.33, 0.31)                  | -0.04 (-0.33, 0.25)                    | 0.04 (-0.32, 0.41)                    |
| Expressive Communication      | -0.20 (-0.56, 0.16)                  | -0.10 (-0.42, 0.22)                  | -0.10 (-0.37, 0.17)                    | -0.09 (-0.45, 0.26)                   |
| Fine Motor                    | 0.10 (-0.30, 0.51)                   | -0.10 (-0.54, 0.34)                  | -0.10 (-0.49, 0.29)                    | 0.00 (-0.48, 0.48)                    |
| Gross Motor                   | 0.27 (-0.18, 0.71)                   | 0.41 (-0.09, 0.92)                   | 0.39 (-0.06, 0.83)                     | 0.44 (-0.10, 0.98)                    |
| Language Composite            | -0.06 (-1.53, 1.41)                  | -0.31 (-1.74, 1.12)                  | -0.38 (-1.64, 0.88)                    | -0.14 (-1.76, 1.48)                   |
| Motor Composite               | 1.12 (-0.92, 3.17)                   | 0.96 (-1.42, 3.33)                   | 0.89 (-1.20, 2.98)                     | 1.34 (-1.17, 3.85)                    |
| Social-Emotional <sup>b</sup> | -0.26 (-0.75, 0.24)                  | -0.80 (-1.35, -0.26)*                | -0.64 (-1.11, -0.17)*                  | -0.75 (-1.32, -0.17)*                 |
| At 2 years (n=550)            |                                      |                                      |                                        |                                       |
| Cognitive                     | 0.02 (-0.26, 0.29)                   | 0.06 (-0.28, 0.41)                   | 0.03 (-0.27, 0.33)                     | 0.09 (-0.25, 0.43)                    |
| Receptive Communication       | -0.15 (-0.43, 0.13)                  | 0.17 (-0.14, 0.48)                   | 0.04 (-0.23, 0.31)                     | 0.07 (-0.26, 0.41)                    |
| Expressive Communication      | -0.27 (-0.70, 0.15)                  | 0.13 (-0.32, 0.59)                   | -0.10 (-0.49, 0.30)                    | -0.09 (-0.59, 0.41)                   |
| Fine Motor                    | 0.15 (-0.16, 0.46)                   | 0.29 (-0.07, 0.65)                   | 0.22 (-0.11, 0.55)                     | 0.31 (-0.08, 0.69)                    |
| Gross Motor                   | -0.14 (-0.41, 0.13)                  | 0.09 (-0.23, 0.42)                   | 0.09 (-0.20, 0.38)                     | 0.12 (-0.24, 0.48)                    |
| Language Composite            | -1.18 (-3.04, 0.68)                  | 0.90 (-1.14, 2.94)                   | -0.15 (-1.95, 1.65)                    | 0.00 (-2.22, 2.23)                    |
| Motor Composite               | 0.03 (-1.40, 1.45)                   | 1.16 (-0.56, 2.88)                   | 0.94 (-0.60, 2.49)                     | 1.29 (-0.57, 3.14)                    |

Coefficients show the change in scaled BSID score associated with a 10-fold increase in in maternal urinary pyrethroid metabolite concentrations. Models adjusted for maternal education, age, marital status, poverty status at delivery, risk for depression (CES-D) and Raven's Coloured Progressive Matrices score (at 1-year visit); food insecurity (USD food security survey); HOME score; preterm delivery; child hemoglobin at 1 year; psychometrician; and time of urine collection (before or after delivery).

<sup>a</sup> Due to 1 missing value, models with 3PBA had 566 participants at 1 year and 549 participants at 2 years.

<sup>b</sup> Social-Emotional outcome models had 570 participants for *cis*-DBCA, *cis*-DCCA, and *trans*-DCCA exposures, and 569 participants for 3PBA.

\*  $p < 0.05$

**Table S15.** Adjusted linear regression  $\beta$  coefficient and 95% confidence interval (CI) for the association between maternal prenatal urinary pyrethroid metabolite concentration (specific gravity-adjusted) and children's performance on the Bayley Scales of Infant Assessment (3<sup>rd</sup> edition) (BSID) at 1 and 2 years, VHEMBE study, Limpopo, South Africa.

Sensitivity analysis: Restricted to subset of children with hemoglobin measurements at 1-year; child hemoglobin level not controlled for in models. (for comparison to Table S14).

| BSID Measure                  | <i>cis</i> -DBCA<br>$\beta$ (95% CI) | <i>cis</i> -DCCA<br>$\beta$ (95% CI) | <i>trans</i> -DCCA<br>$\beta$ (95% CI) | 3PBA <sup>a</sup><br>$\beta$ (95% CI) |
|-------------------------------|--------------------------------------|--------------------------------------|----------------------------------------|---------------------------------------|
| At 1 year (n=567)             |                                      |                                      |                                        |                                       |
| Cognitive                     | 0.13 (-0.22, 0.49)                   | -0.02 (-0.37, 0.33)                  | -0.01 (-0.31, 0.29)                    | 0.03 (-0.36, 0.41)                    |
| Receptive Communication       | 0.18 (-0.11, 0.47)                   | -0.01 (-0.33, 0.31)                  | -0.04 (-0.33, 0.25)                    | 0.04 (-0.32, 0.40)                    |
| Expressive Communication      | -0.21 (-0.56, 0.15)                  | -0.10 (-0.42, 0.22)                  | -0.11 (-0.38, 0.16)                    | -0.11 (-0.46, 0.24)                   |
| Fine Motor                    | 0.10 (-0.30, 0.51)                   | -0.10 (-0.54, 0.34)                  | -0.10 (-0.49, 0.29)                    | -0.01 (-0.49, 0.47)                   |
| Gross Motor                   | 0.25 (-0.20, 0.71)                   | 0.40 (-0.10, 0.91)                   | 0.37 (-0.08, 0.81)                     | 0.41 (-0.13, 0.94)                    |
| Language Composite            | -0.08 (-1.53, 1.38)                  | -0.32 (-1.75, 1.11)                  | -0.41 (-1.67, 0.85)                    | -0.19 (-1.79, 1.42)                   |
| Motor Composite               | 1.08 (-0.99, 3.16)                   | 0.93 (-1.43, 3.30)                   | 0.83 (-1.25, 2.91)                     | 1.22 (-1.28, 3.73)                    |
| Social-Emotional <sup>b</sup> | -0.25 (-0.75, 0.24)                  | -0.80 (-1.35, -0.25)*                | -0.63 (-1.11, -0.16)*                  | -0.73 (-1.30, -0.15)*                 |
| At 2 years (n=550)            |                                      |                                      |                                        |                                       |
| Cognitive                     | 0.01 (-0.26, 0.28)                   | 0.06 (-0.28, 0.41)                   | 0.03 (-0.27, 0.33)                     | 0.08 (-0.26, 0.42)                    |
| Receptive Communication       | -0.15 (-0.43, 0.13)                  | 0.17 (-0.14, 0.48)                   | 0.04 (-0.24, 0.31)                     | 0.07 (-0.27, 0.41)                    |
| Expressive Communication      | -0.27 (-0.70, 0.15)                  | 0.13 (-0.32, 0.59)                   | -0.10 (-0.49, 0.30)                    | -0.09 (-0.59, 0.41)                   |
| Fine Motor                    | 0.15 (-0.16, 0.46)                   | 0.29 (-0.07, 0.65)                   | 0.22 (-0.11, 0.55)                     | 0.31 (-0.08, 0.70)                    |
| Gross Motor                   | -0.14 (-0.41, 0.13)                  | 0.09 (-0.23, 0.42)                   | 0.08 (-0.20, 0.37)                     | 0.11 (-0.25, 0.47)                    |
| Language Composite            | -1.19 (-3.05, 0.67)                  | 0.90 (-1.14, 2.94)                   | -0.15 (-1.95, 1.64)                    | -0.01 (-2.24, 2.22)                   |
| Motor Composite               | 0.02 (-1.41, 1.44)                   | 1.16 (-0.55, 2.87)                   | 0.93 (-0.61, 2.48)                     | 1.26 (-0.60, 3.13)                    |

Coefficients show the change in scaled BSID score associated with a 10-fold increase in in maternal DDT/E serum concentrations. Models adjusted for maternal education, age, marital status, poverty status at delivery, risk for depression (CES-D) and Raven's Coloured Progressive Matrices score (at 1-year visit); food insecurity (USD food security survey); HOME score; preterm delivery; psychometrician; and time of urine collection (before or after delivery).

<sup>a</sup> Due to 1 missing value, models with 3PBA had 566 participants at 1 year and 549 participants at 2 years.

<sup>b</sup> Social-Emotional outcome models had 570 participants for *cis*-DBCA, *cis*-DCCA, and *trans*-DCCA exposures, and 569 participants for 3PBA.

\* $p < 0.05$

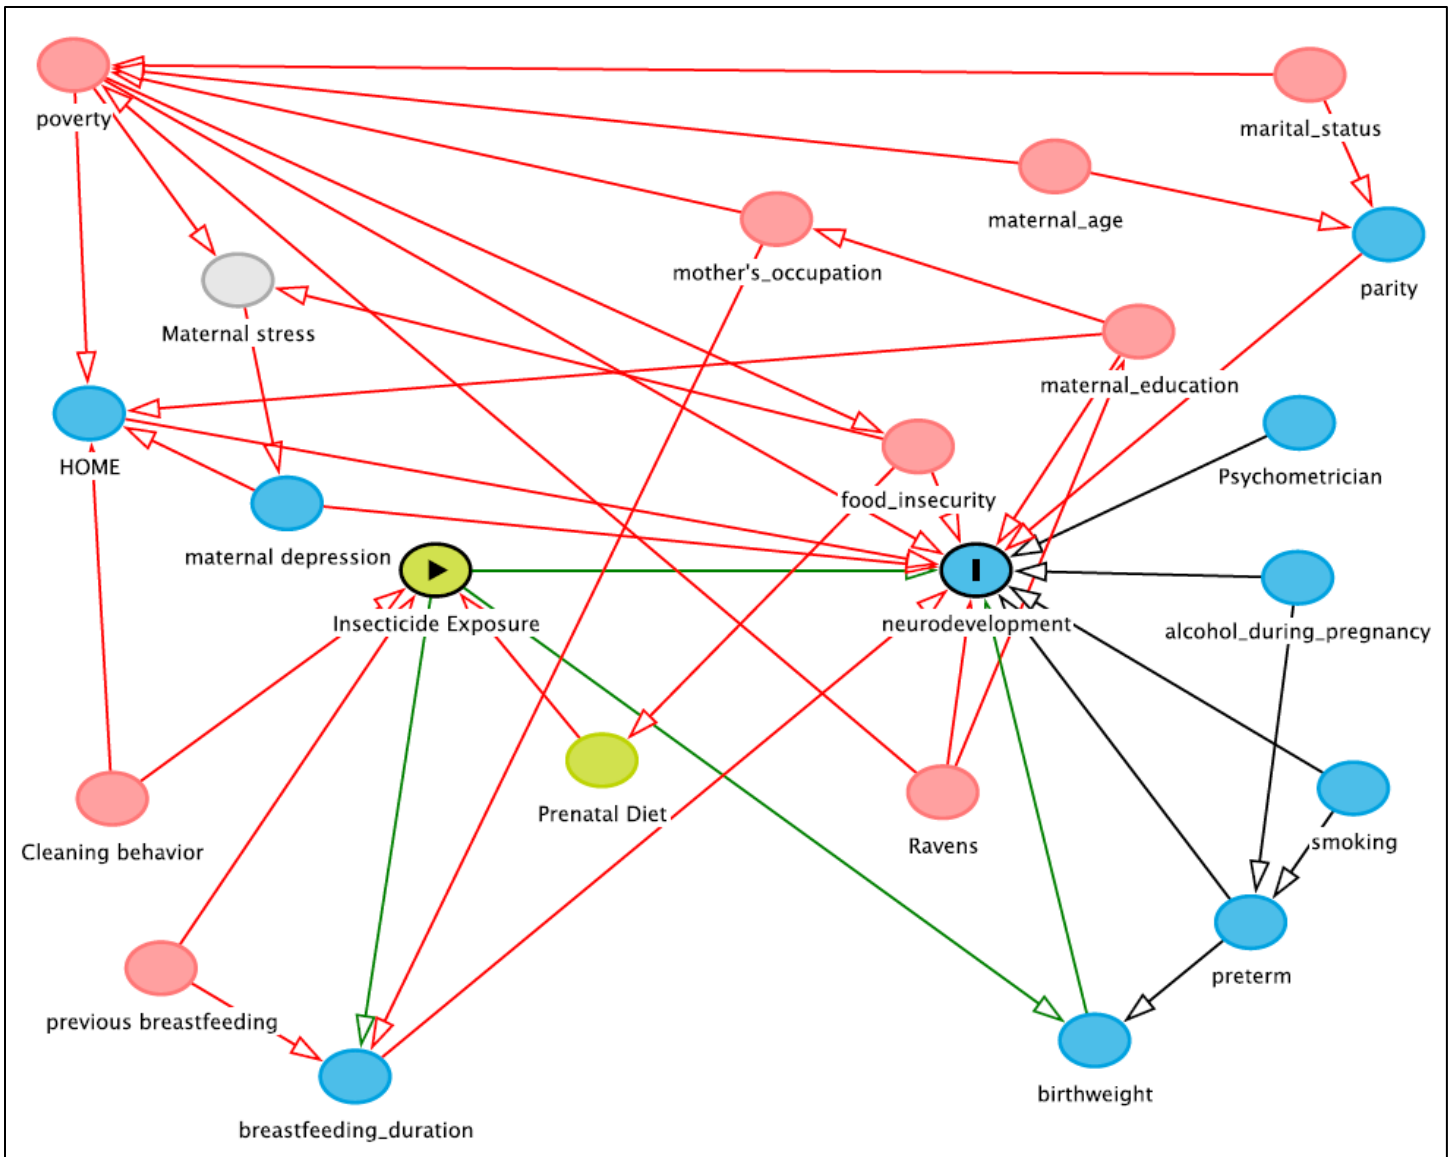

**Figure S1.** Directed Acyclic Graph (DAG) of possible confounding in the relationship between DDT/pyrethroid insecticides and children's performance on the Bayley Scales of Infant Assessment (3<sup>rd</sup> edition) (BSID) at 1 and 2 years, VHEMBE study, Limpopo, South Africa.

Blue circles indicate ancestors of outcomes; green circles indicate ancestors of exposures; red circles indicate ancestors of exposures and outcomes; gray circles represent unobserved (latent) variables. Green arrows represent causal paths; red arrows represent biasing paths. Right-facing triangle represents the primary exposure; I symbol represents the outcome.

DAG based on Textor J, Hardt J, Knuppel S. 2011. DAGitty: a graphical tool for analyzing causal diagrams. *Epidemiology* 22:745, and produced at <http://www.dagitty.net>

Cognitive Scores at 1 year: Bivariate relationships of Chemical Exposures

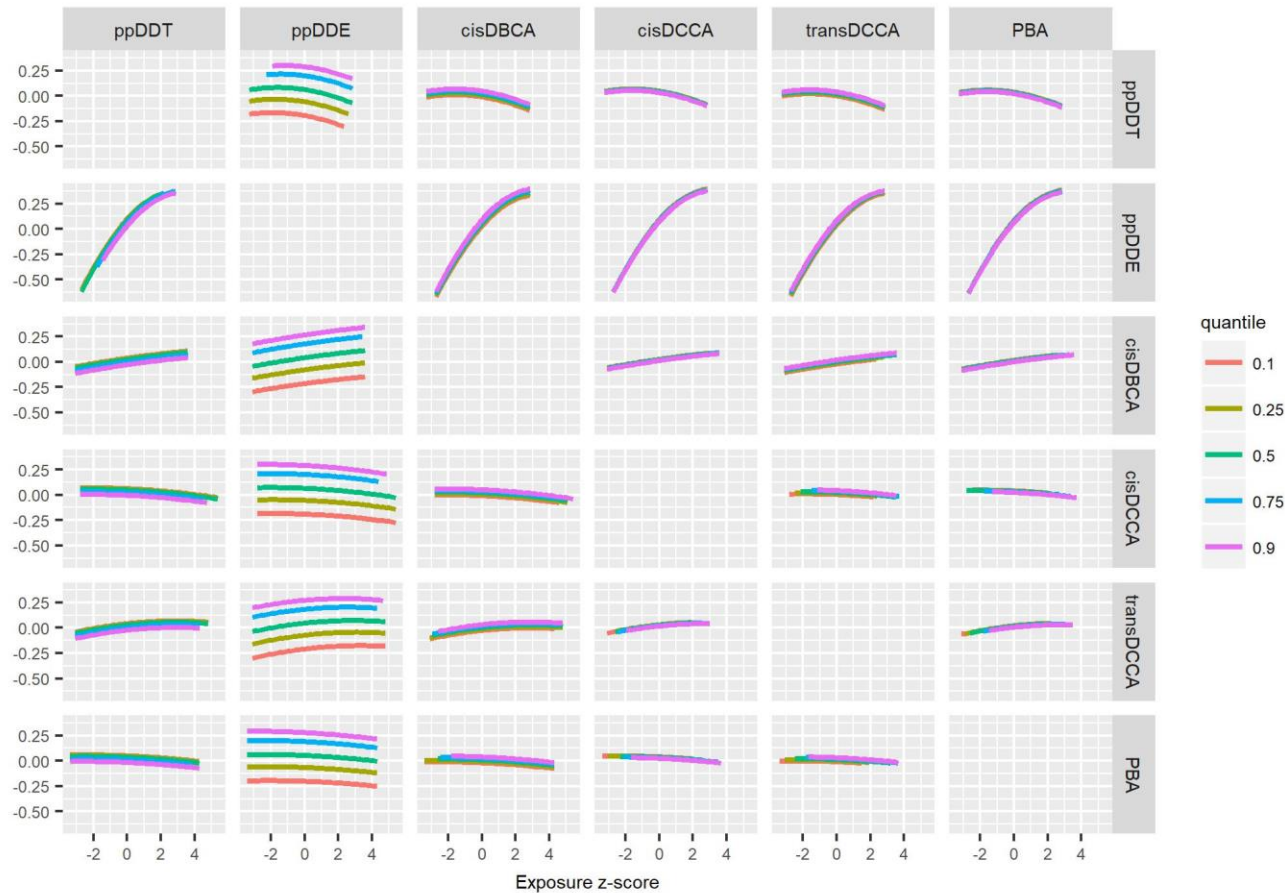

**Figure S2.** Bivariate relationships of chemical exposures in the relationship between DDT/pyrethroid insecticides and children’s performance on the Cognitive subscale of the Bayley Scales of Infant Assessment (3<sup>rd</sup> edition) (BSID) at 1 year, VHEMBE study, Limpopo, South Africa.

Figure S2 displays graphical output from Bayesian Kernel Machine Regression (BKMR) to indicate whether there is evidence for pair-wise interactions between chemical exposures. Plots show the exposure-response relationships of a specific chemical exposure, when the other member of the paired exposure is held at specified quantiles. For example, the second plot in the first row shows the exposure-response relationships for *p,p'*-DDE with the Bayley score when *p,p'*-DDT is held a quantiles of 10%, 25%, 50%, 75%, and 90%. The presence of non-parallel lines in these plots would provide evidence of a bivariate interaction between the paired exposures; however, each pair-wise exposure resulted in parallel lines and therefore suggests no between-chemical interactions in our study.

### Expressive Communication Scores at 1 year: Bivariate relationships of Chemical Exposures

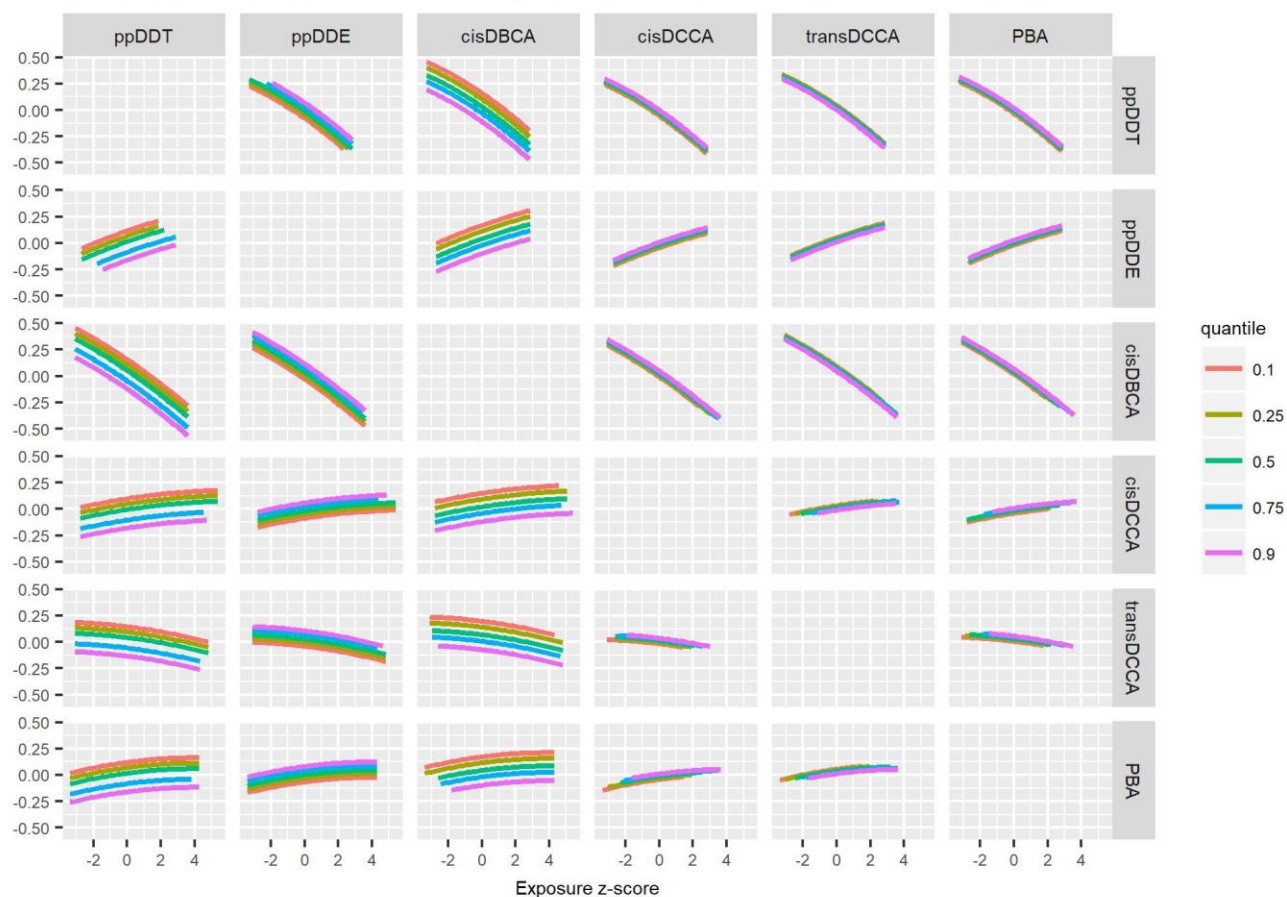

**Figure S3.** Bivariate relationships of chemical exposures in the relationship between DDT/pyrethroid insecticides and children’s performance on the Expressive Communication scale of the Bayley Scales of Infant Assessment (3<sup>rd</sup> edition) (BSID) at 1 year, VHEMBE study, Limpopo, South Africa.

Figure S3 displays graphical output from Bayesian Kernel Machine Regression (BKMR) to indicate whether there is evidence for pair-wise interactions between chemical exposures. Plots show the exposure-response relationships of a specific chemical exposure, when the other member of the paired exposure is held at specified quantiles. For example, the second plot in the first row shows the exposure-response relationships for *p,p'*-DDE with the Bayley score when *p,p'*-DDT is held a quantiles of 10%, 25%, 50%, 75%, and 90%. The presence of non-parallel lines in these plots would provide evidence of a bivariate interaction between the paired exposures; however, each pair-wise exposure resulted in parallel lines and therefore suggests no between-chemical interactions in our study.



Receptive Communication Scores at 1 year: Bivariate relationships of Chemical Exposures

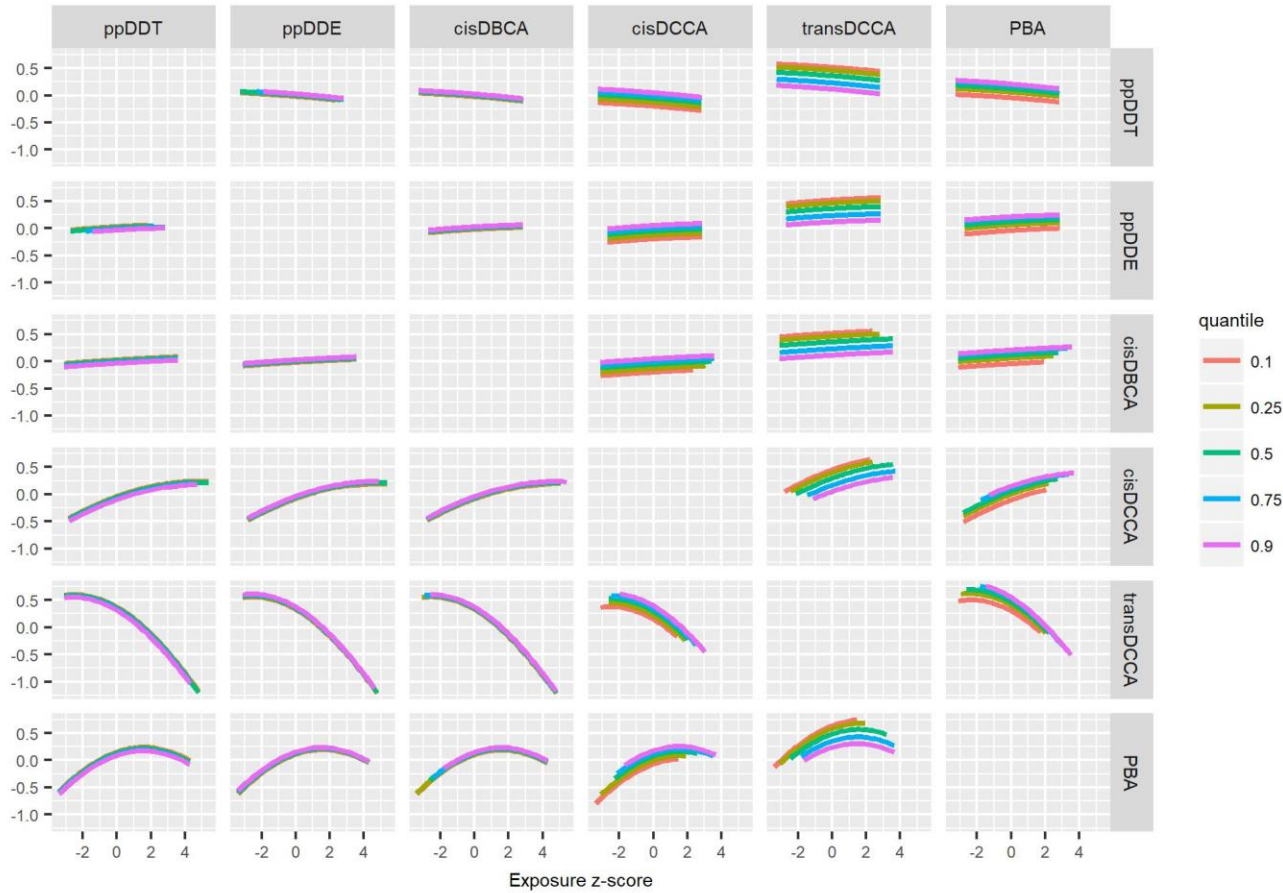

**Figure S4.** Bivariate relationships of chemical exposures in the relationship between DDT/pyrethroid insecticides and children’s performance on the Receptive Communication subscale of the Bayley Scales of Infant Assessment (3<sup>rd</sup> edition) (BSID) at 1 year, VHEMBE study, Limpopo, South Africa.

Figure S4 displays graphical output from Bayesian Kernel Machine Regression (BKMR) to indicate whether there is evidence for pair-wise interactions between chemical exposures. Plots show the exposure-response relationships of a specific chemical exposure, when the other member of the paired exposure is held at specified quantiles. For example, the second plot in the first row shows the exposure-response relationships for *p,p'*-DDE with the Bayley score when *p,p'*-DDT is held a quantiles of 10%, 25%, 50%, 75%, and 90%. The presence of non-parallel lines in these plots would provide evidence of a bivariate interaction between the paired exposures; however, each pair-wise exposure resulted in parallel lines and therefore suggests no between-chemical interactions in our study.

Fine Motor Scores at 1 year: Bivariate relationships of Chemical Exposures

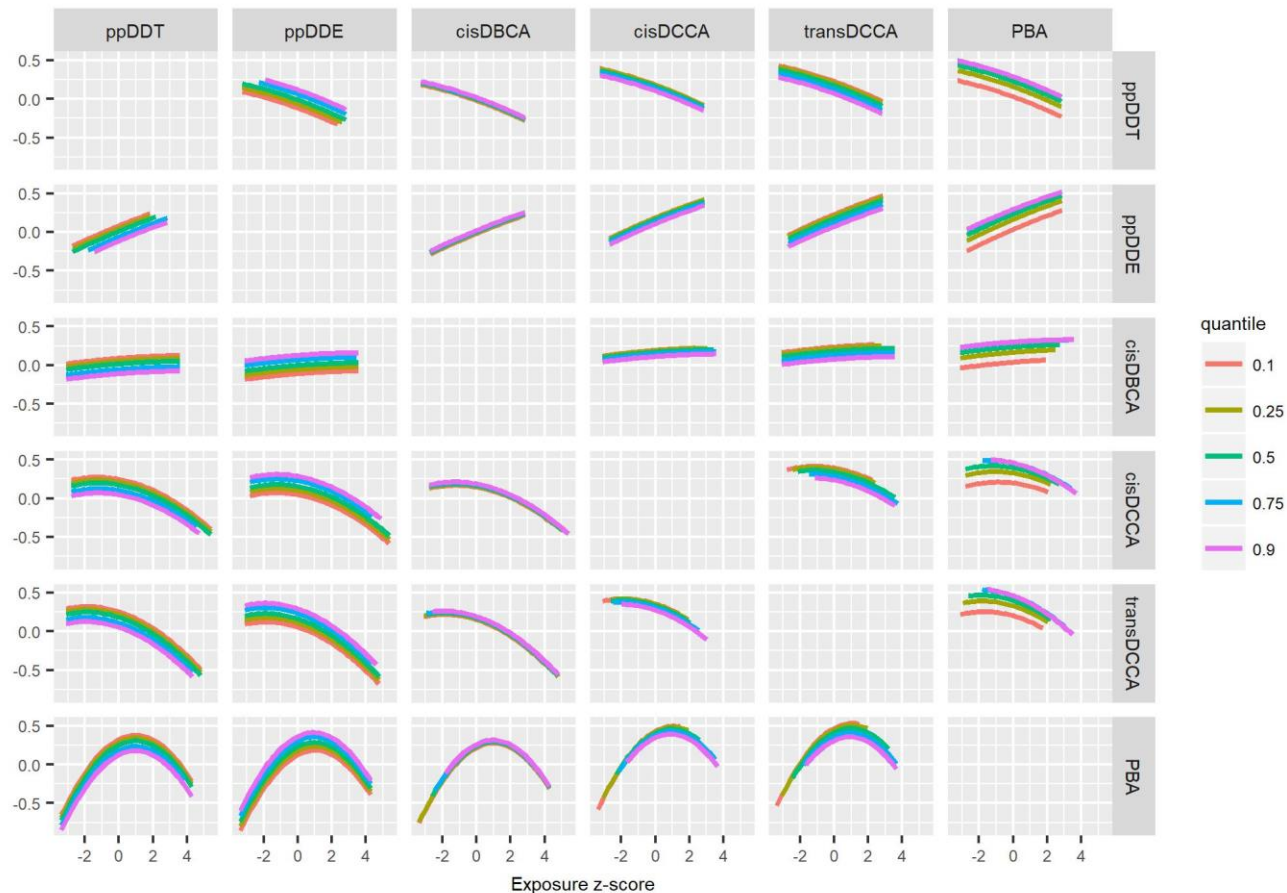

**Figure S5.** Bivariate relationships of chemical exposures in the relationship between DDT/pyrethroid insecticides and children’s performance on the Fine Motor subscale of the Bayley Scales of Infant Assessment (3<sup>rd</sup> edition) (BSID) at 1 year, VHEMBE study, Limpopo, South Africa.

Figure S5 displays graphical output from Bayesian Kernel Machine Regression (BKMR) to indicate whether there is evidence for pair-wise interactions between chemical exposures. Plots show the exposure-response relationships of a specific chemical exposure, when the other member of the paired exposure is held at specified quantiles. For example, the second plot in the first row shows the exposure-response relationships for *p,p'*-DDE with the Bayley score when *p,p'*-DDT is held a quantiles of 10%, 25%, 50%, 75%, and 90%. The presence of non-parallel lines in these plots would provide evidence of a bivariate interaction between the paired exposures; however, each pair-wise exposure resulted in parallel lines and therefore suggests no between-chemical interactions in our study.



Gross Motor Scores at 1 year: Bivariate relationships of Chemical Exposures

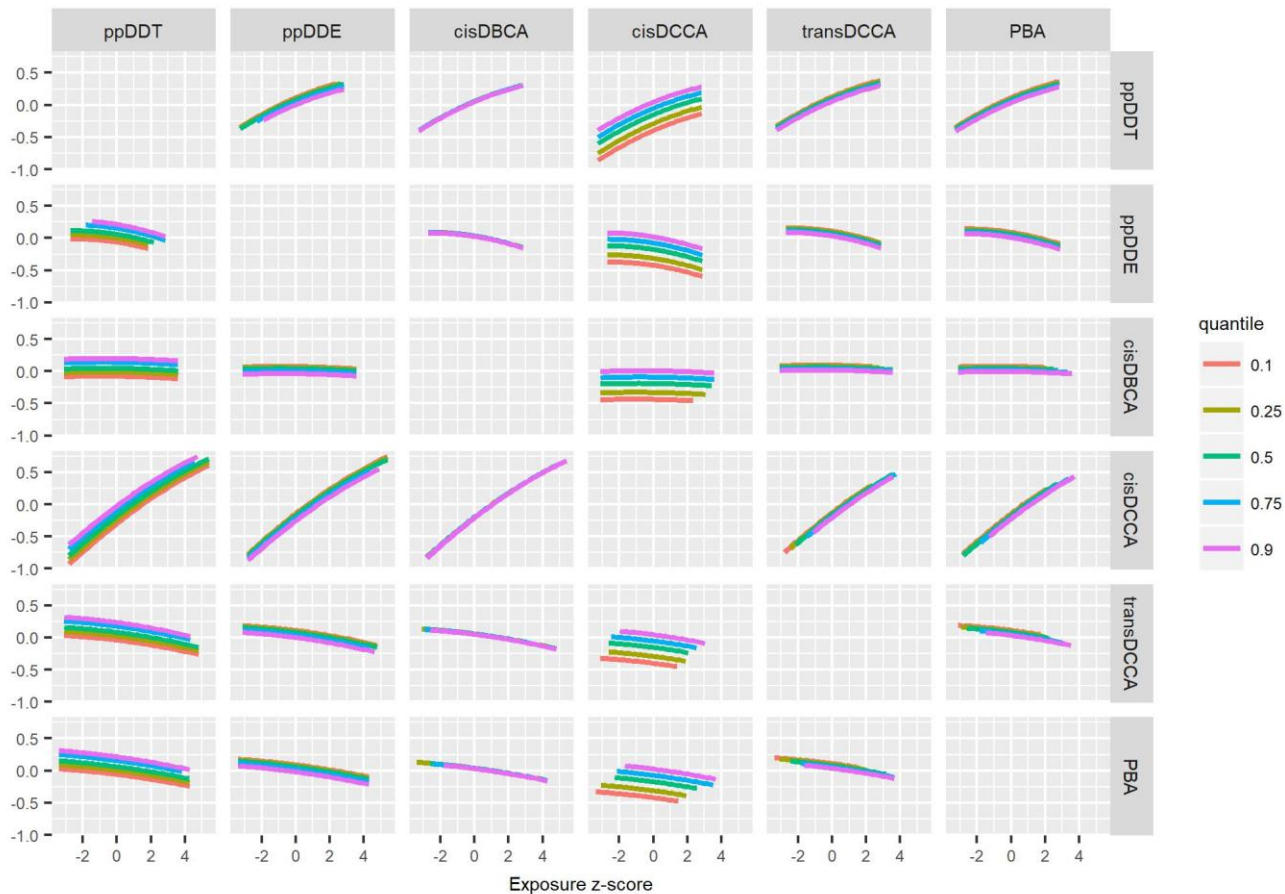

**Figure S6.** Bivariate relationships of chemical exposures in the relationship between DDT/pyrethroid insecticides and children’s performance on the Gross Motor subscale of the Bayley Scales of Infant Assessment (3<sup>rd</sup> edition) (BSID) at 1 year, VHEMBE study, Limpopo, South Africa.

Figure S6 displays graphical output from Bayesian Kernel Machine Regression (BKMR) to indicate whether there is evidence for pair-wise interactions between chemical exposures. Plots show the exposure-response relationships of a specific chemical exposure, when the other member of the paired exposure is held at specified quantiles. For example, the second plot in the first row shows the exposure-response relationships for *p,p'*-DDE with the Bayley score when *p,p'*-DDT is held a quantiles of 10%, 25%, 50%, 75%, and 90%. The presence of non-parallel lines in these plots would provide evidence of a bivariate interaction between the paired exposures; however, each pair-wise exposure resulted in parallel lines and therefore suggests no between-chemical interactions in our study.

Language Composite Scores at 1 year: Bivariate relationships of Chemical Exposures

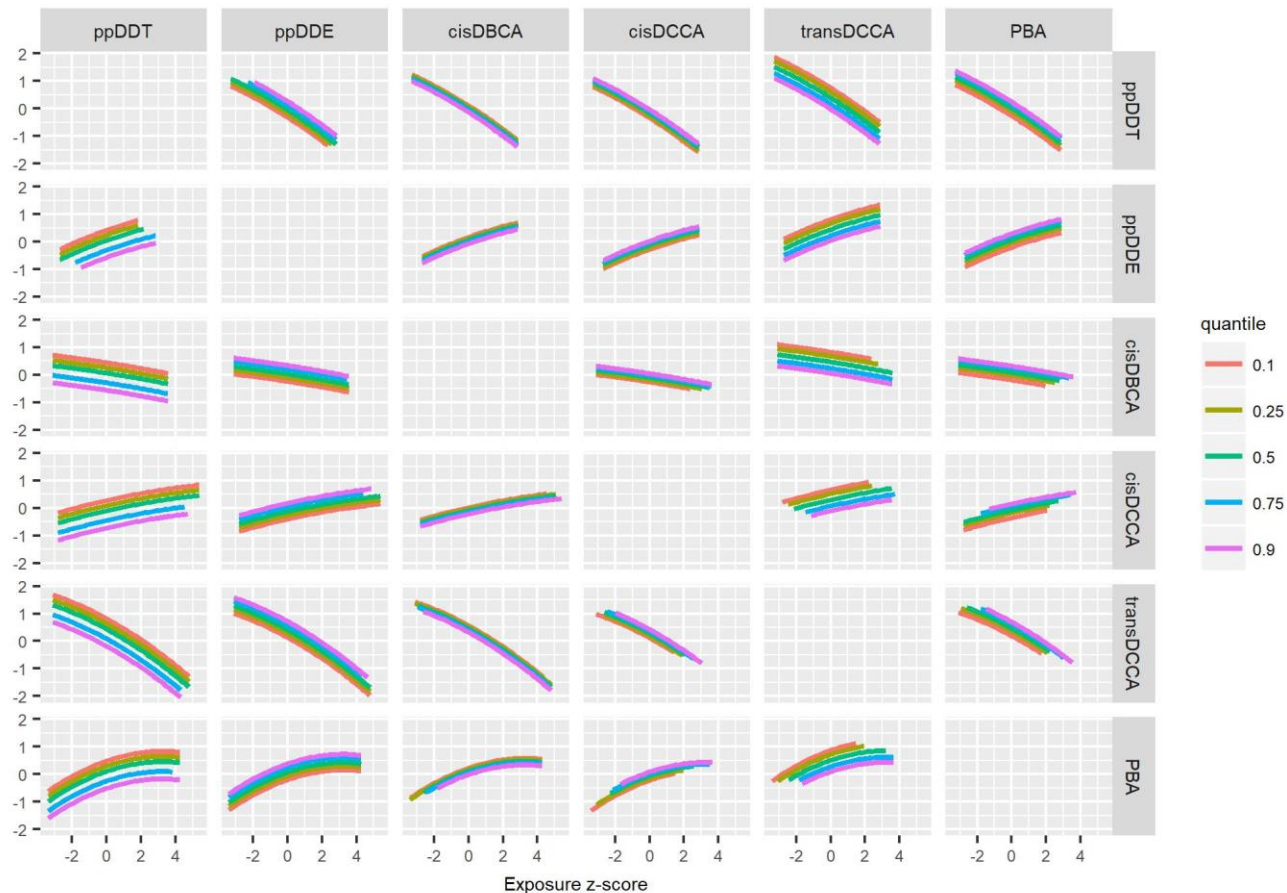

**Figure S7.** Bivariate relationships of chemical exposures in the relationship between DDT/pyrethroid insecticides and children’s performance on the Language Composite scale of the Bayley Scales of Infant Assessment (3<sup>rd</sup> edition) (BSID) at 1 year, VHEMBE study, Limpopo, South Africa.

Figure S7 displays graphical output from Bayesian Kernel Machine Regression (BKMR) to indicate whether there is evidence for pair-wise interactions between chemical exposures. Plots show the exposure-response relationships of a specific chemical exposure, when the other member of the paired exposure is held at specified quantiles. For example, the second plot in the first row shows the exposure-response relationships for *p,p'*-DDE with the Bayley score when *p,p'*-DDT is held a quantiles of 10%, 25%, 50%, 75%, and 90%. The presence of non-parallel lines in these plots would provide evidence of a bivariate interaction between the paired exposures; however, each pair-wise exposure resulted in parallel lines and therefore suggests no between-chemical interactions in our study.

Motor Composite Scores at 1 year: Bivariate relationships of Chemical Exposures

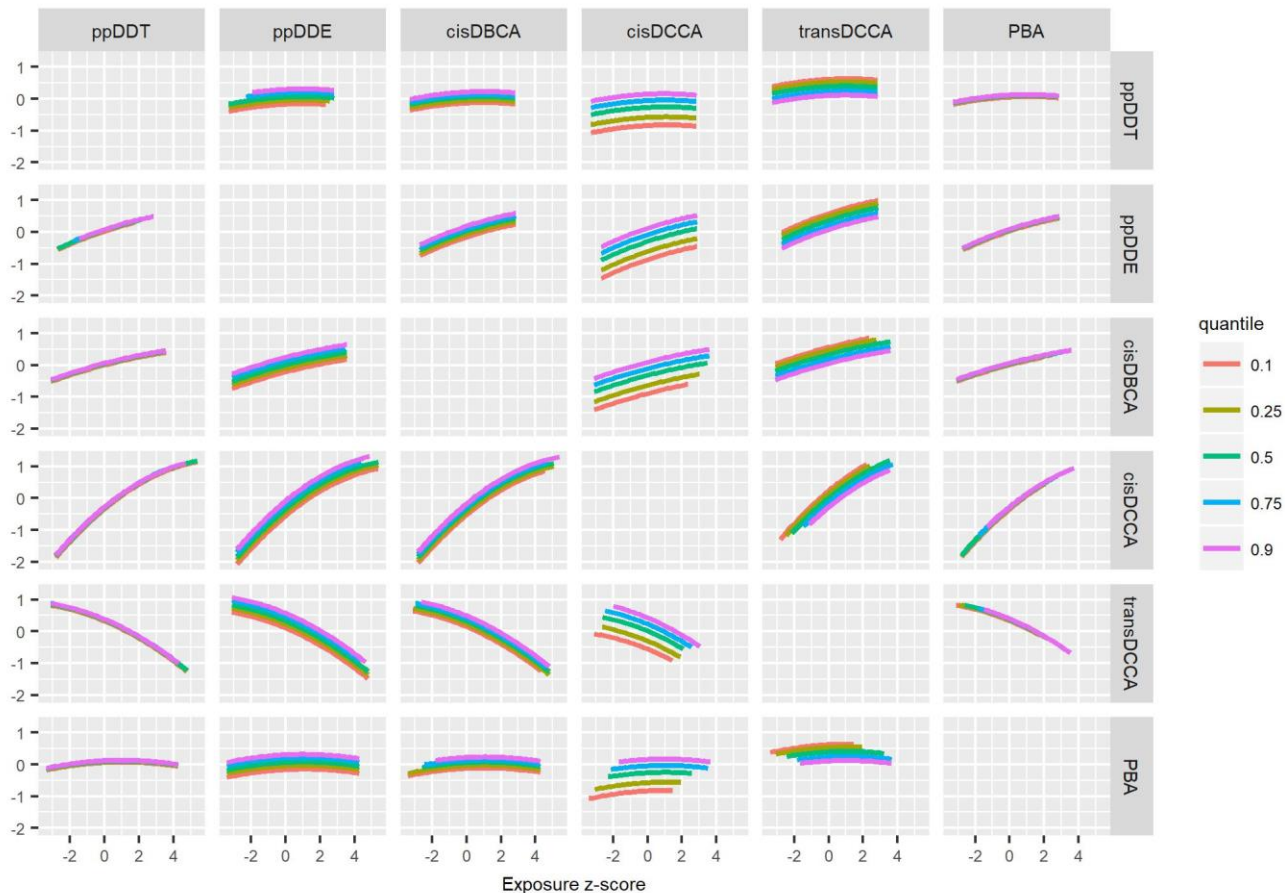

**Figure S8.** Bivariate relationships of chemical exposures in the relationship between DDT/pyrethroid insecticides and children’s performance on the Motor Composite scale of the Bayley Scales of Infant Assessment (3<sup>rd</sup> edition) (BSID) at 1 year, VHEMBE study, Limpopo, South Africa.

Figure S8 displays graphical output from Bayesian Kernel Machine Regression (BKMR) to indicate whether there is evidence for pair-wise interactions between chemical exposures. Plots show the exposure-response relationships of a specific chemical exposure, when the other member of the paired exposure is held at specified quantiles. For example, the second plot in the first row shows the exposure-response relationships for *p,p'*-DDE with the Bayley score when *p,p'*-DDT is held a quantiles of 10%, 25%, 50%, 75%, and 90%. The presence of non-parallel lines in these plots would provide evidence of a bivariate interaction between the paired exposures; however, each pair-wise exposure resulted in parallel lines and therefore suggests no between-chemical interactions in our study.

### Social-Emotional Scores at 1 year: Bivariate relationships of Chemical Exposures

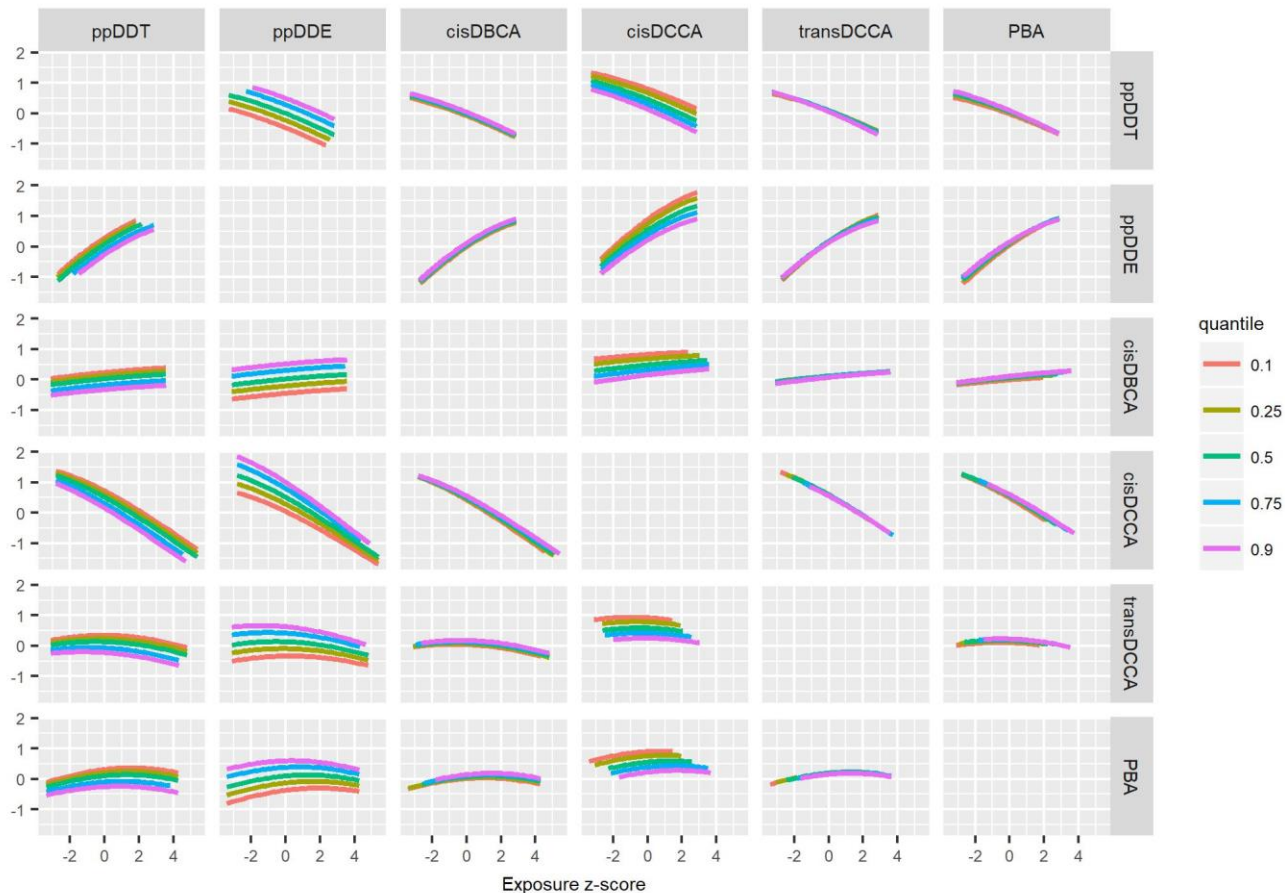

**Figure S9.** Bivariate relationships of chemical exposures in the relationship between DDT/pyrethroid insecticides and children’s performance on the Bayley Social-Emotional subscale of the Bayley Scales of Infant Assessment (3<sup>rd</sup> edition) (BSID) at 1 year, VHEMBE study, Limpopo, South Africa.

Figure S9 displays graphical output from Bayesian Kernel Machine Regression (BKMR) to indicate whether there is evidence for pair-wise interactions between chemical exposures. Plots show the exposure-response relationships of a specific chemical exposure, when the other member of the paired exposure is held at specified quantiles. For example, the second plot in the first row shows the exposure-response relationships for *p,p'*-DDE with the Bayley score when *p,p'*-DDT is held a quantiles of 10%, 25%, 50%, 75%, and 90%. The presence of non-parallel lines in these plots would provide evidence of a bivariate interaction between the paired exposures; however, each pair-wise exposure resulted in parallel lines and therefore suggests no between-chemical interactions in our study.



Cognitive Scores at 2 years: Bivariate relationships of Chemical Exposures

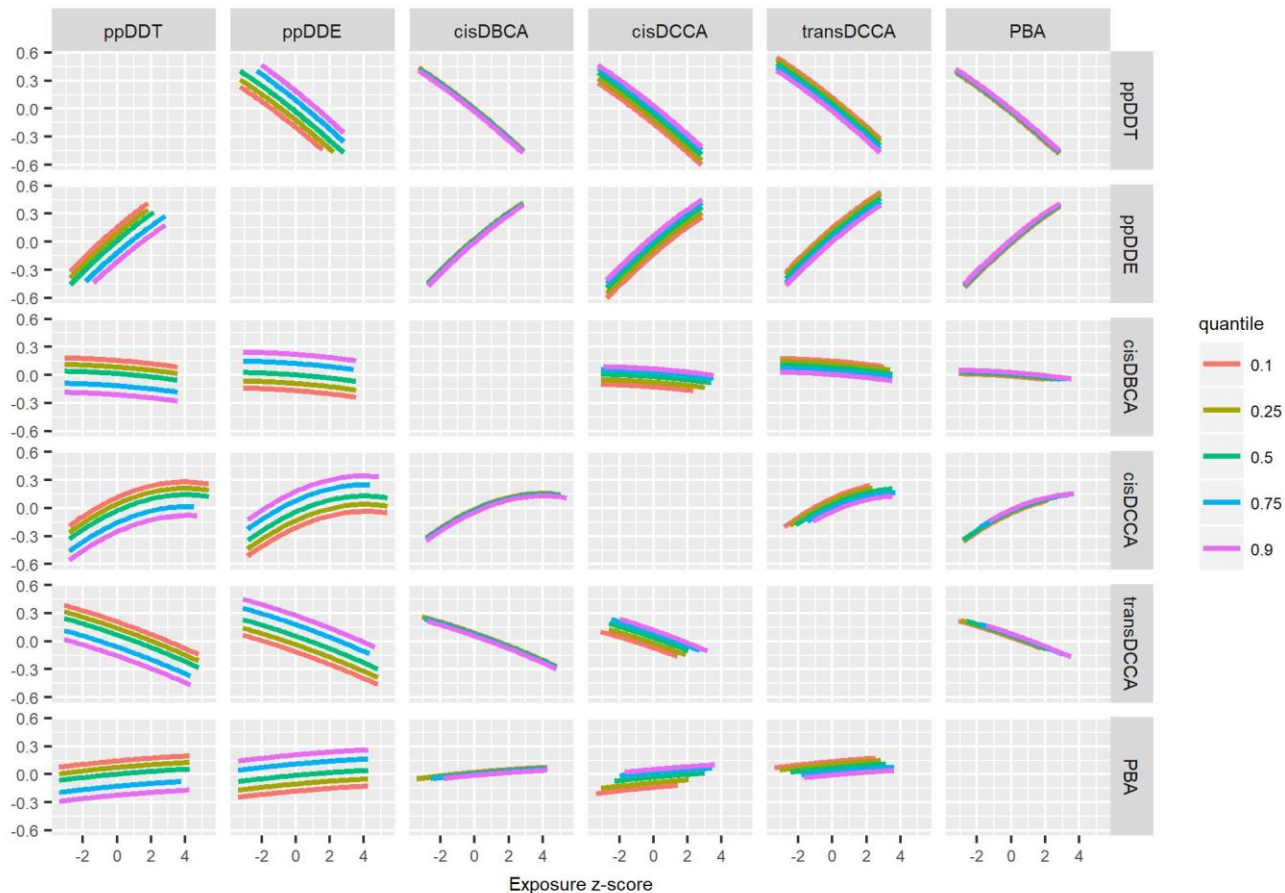

**Figure S10.** Bivariate relationships of chemical exposures in the relationship between DDT/pyrethroid insecticides and children’s performance on the Cognitive subscale of the Bayley Scales of Infant Assessment (3<sup>rd</sup> edition) (BSID) at 2 years, VHEMBE study, Limpopo, South Africa.

Figure S10 displays graphical output from Bayesian Kernel Machine Regression (BKMR) to indicate whether there is evidence for pair-wise interactions between chemical exposures. Plots show the exposure-response relationships of a specific chemical exposure, when the other member of the paired exposure is held at specified quantiles. For example, the second plot in the first row shows the exposure-response relationships for *p,p'*-DDE with the Bayley score when *p,p'*-DDT is held a quantiles of 10%, 25%, 50%, 75%, and 90%. The presence of non-parallel lines in these plots would provide evidence of a bivariate interaction between the paired exposures; however, each pair-wise exposure resulted in parallel lines and therefore suggests no between-chemical interactions in our study.

### Expressive Communication Scores at 2 years: Bivariate relationships of Chemical Exposures

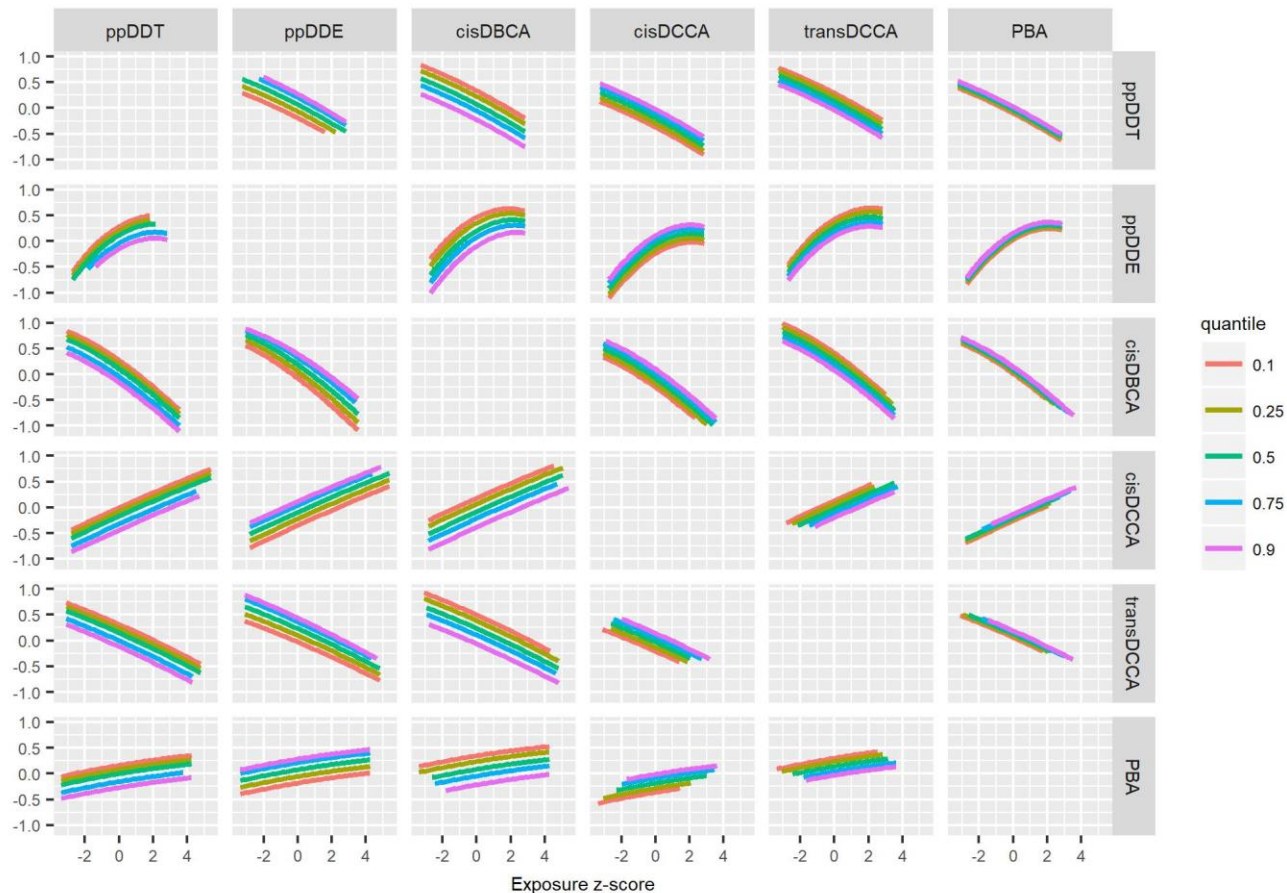

**Figure S11.** Bivariate relationships of chemical exposures in the relationship between DDT/pyrethroid insecticides and children’s performance on the Expressive Communication subscale of the Bayley Scales of Infant Assessment (3<sup>rd</sup> edition) (BSID) at 2 years, VHEMBE study, Limpopo, South Africa.

Figure S11 displays graphical output from Bayesian Kernel Machine Regression (BKMR) to indicate whether there is evidence for pair-wise interactions between chemical exposures. Plots show the exposure-response relationships of a specific chemical exposure, when the other member of the paired exposure is held at specified quantiles. For example, the second plot in the first row shows the exposure-response relationships for *p,p'*-DDE with the Bayley score when *p,p'*-DDT is held a quantiles of 10%, 25%, 50%, 75%, and 90%. The presence of non-parallel lines in these plots would provide evidence of a bivariate interaction between the paired exposures; however, each pair-wise exposure resulted in parallel lines and therefore suggests no between-chemical interactions in our study.

### Receptive Communication Scores at 2 years: Bivariate relationships of Chemical Exposures

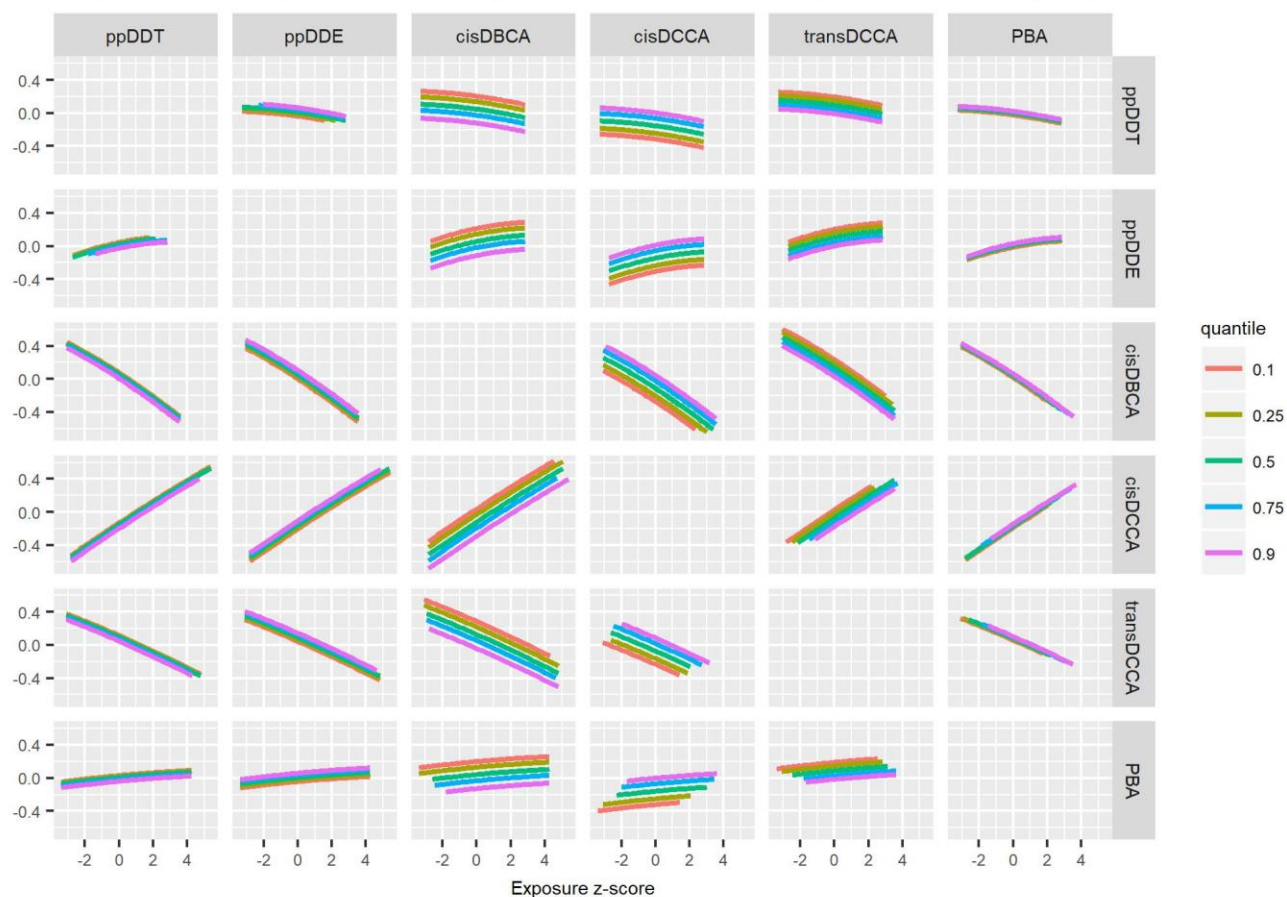

**Figure S12.** Bivariate relationships of chemical exposures in the relationship between DDT/pyrethroid insecticides and children’s performance on the Receptive Communication subscale of the Bayley Scales of Infant Assessment (3<sup>rd</sup> edition) (BSID) at 2 years, VHEMBE study, Limpopo, South Africa.

Figure S12 displays graphical output from Bayesian Kernel Machine Regression (BKMR) to indicate whether there is evidence for pair-wise interactions between chemical exposures. Plots show the exposure-response relationships of a specific chemical exposure, when the other member of the paired exposure is held at specified quantiles. For example, the second plot in the first row shows the exposure-response relationships for *p,p'*-DDE with the Bayley score when *p,p'*-DDT is held a quantiles of 10%, 25%, 50%, 75%, and 90%. The presence of non-parallel lines in these plots would provide evidence of a bivariate interaction between the paired exposures; however, each pair-wise exposure resulted in parallel lines and therefore suggests no between-chemical interactions in our study.

Fine Motor Scores at 2 years: Bivariate relationships of Chemical Exposures

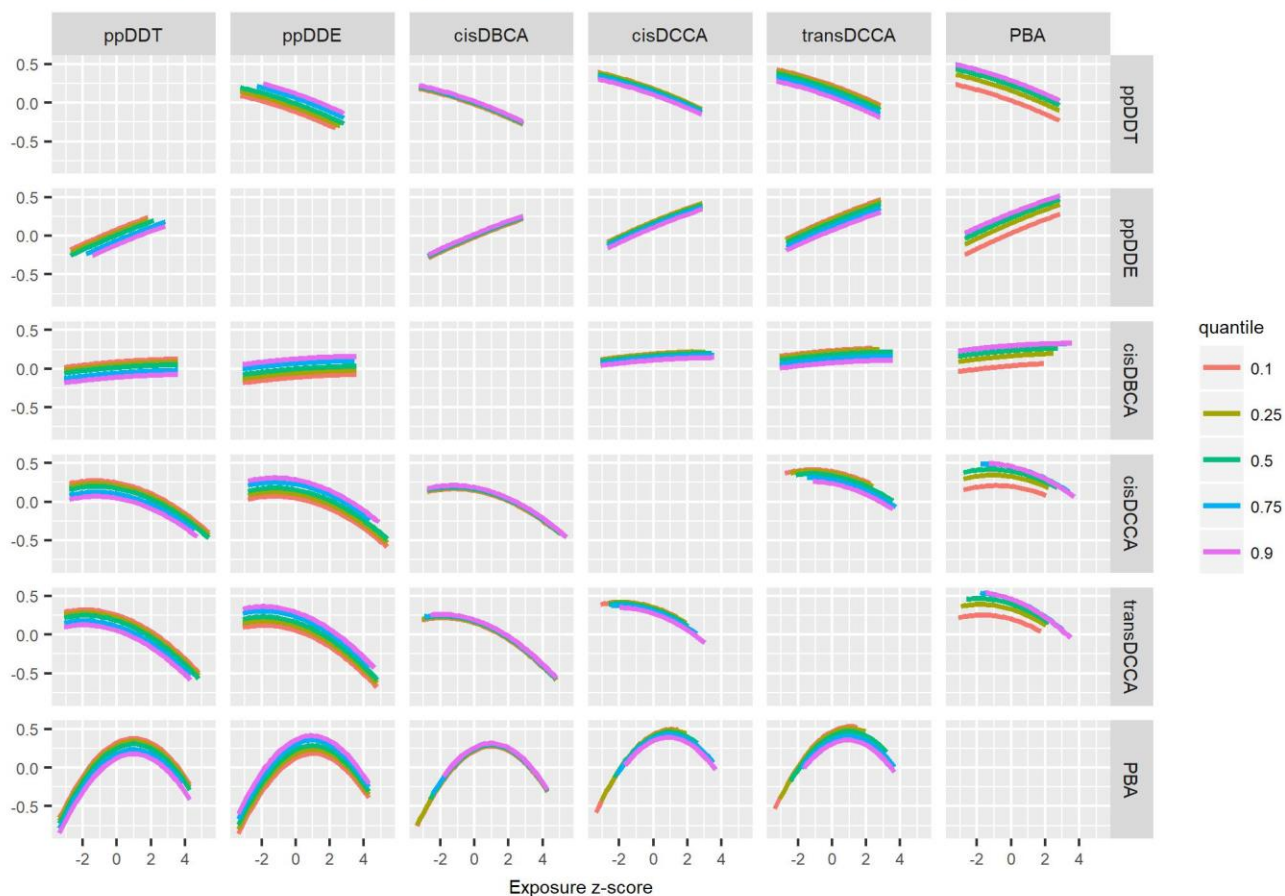

**Figure S13.** Bivariate relationships of chemical exposures in the relationship between DDT/pyrethroid insecticides and children’s performance on the Fine Motor subscale of the Bayley Scales of Infant Assessment (3<sup>rd</sup> edition) (BSID) at 2 years, VHEMBE study, Limpopo, South Africa.

Figure S13 displays graphical output from Bayesian Kernel Machine Regression (BKMR) to indicate whether there is evidence for pair-wise interactions between chemical exposures. Plots show the exposure-response relationships of a specific chemical exposure, when the other member of the paired exposure is held at specified quantiles. For example, the second plot in the first row shows the exposure-response relationships for *p,p'*-DDE with the Bayley score when *p,p'*-DDT is held a quantiles of 10%, 25%, 50%, 75%, and 90%. The presence of non-parallel lines in these plots would provide evidence of a bivariate interaction between the paired exposures; however, each pair-wise exposure resulted in parallel lines and therefore suggests no between-chemical interactions in our study.



Gross Motor Scores at 2 years: Bivariate relationships of Chemical Exposures

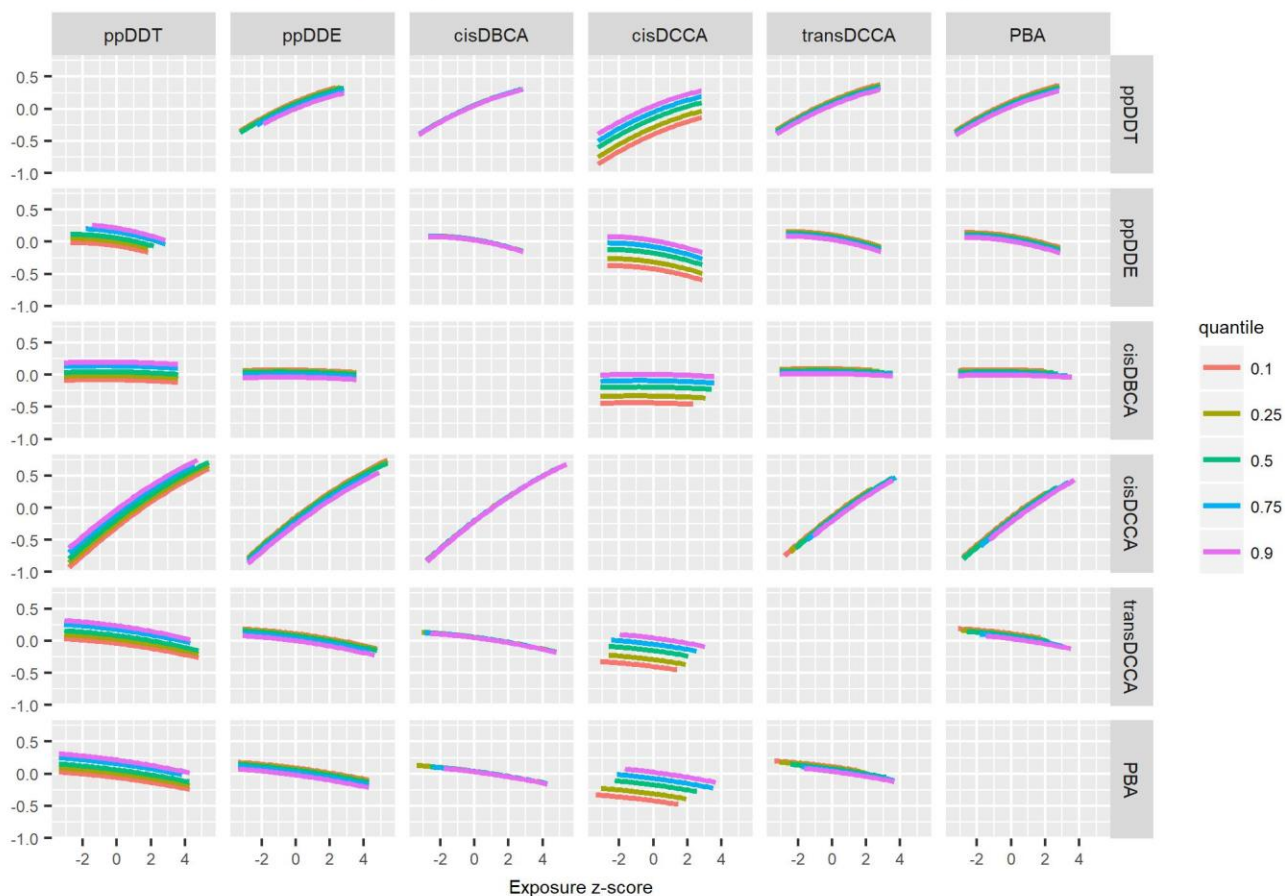

**Figure S14.** Bivariate relationships of chemical exposures in the relationship between DDT/pyrethroid insecticides and children’s performance on the Gross Motor subscale of the Bayley Scales of Infant Assessment (3<sup>rd</sup> edition) (BSID) at 2 years, VHEMBE study, Limpopo, South Africa.

Figure S14 displays graphical output from Bayesian Kernel Machine Regression (BKMR) to indicate whether there is evidence for pair-wise interactions between chemical exposures. Plots show the exposure-response relationships of a specific chemical exposure, when the other member of the paired exposure is held at specified quantiles. For example, the second plot in the first row shows the exposure-response relationships for *p,p'*-DDE with the Bayley score when *p,p'*-DDT is held a quantiles of 10%, 25%, 50%, 75%, and 90%. The presence of non-parallel lines in these plots would provide evidence of a bivariate interaction between the paired exposures; however, each pair-wise exposure resulted in parallel lines and therefore suggests no between-chemical interactions in our study.

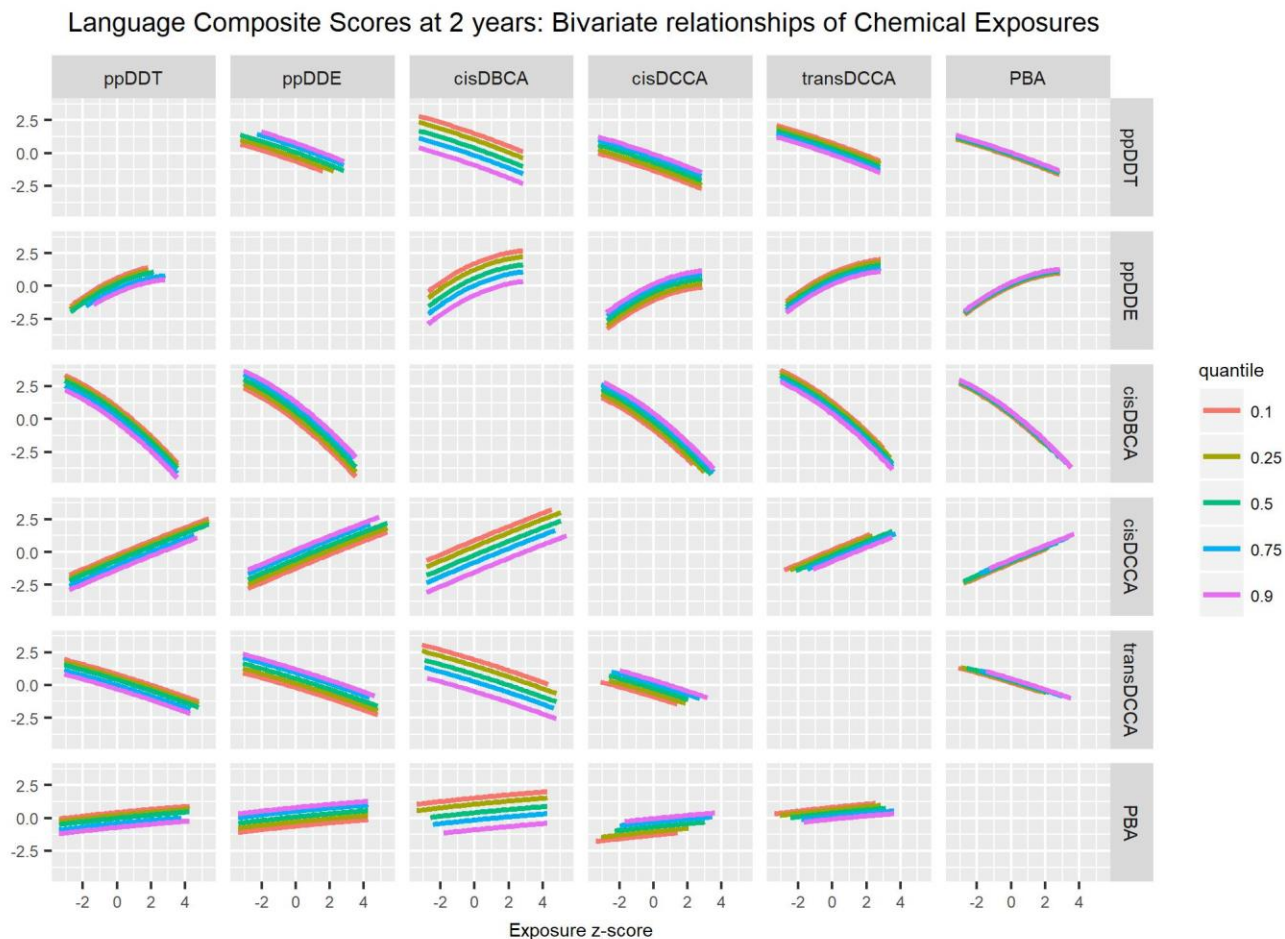

**Figure S15.** Bivariate relationships of chemical exposures in the relationship between DDT/pyrethroid insecticides and children’s performance on the Language Composite scale of the Bayley Scales of Infant Assessment (3<sup>rd</sup> edition) (BSID) at 2 years, VHEMBE study, Limpopo, South Africa.

Figure S15 displays graphical output from Bayesian Kernel Machine Regression (BKMR) to indicate whether there is evidence for pair-wise interactions between chemical exposures. Plots show the exposure-response relationships of a specific chemical exposure, when the other member of the paired exposure is held at specified quantiles. For example, the second plot in the first row shows the exposure-response relationships for *p,p'*-DDE with the Bayley score when *p,p'*-DDT is held a quantiles of 10%, 25%, 50%, 75%, and 90%. The presence of non-parallel lines in these plots would provide evidence of a bivariate interaction between the paired exposures; however, each pair-wise exposure resulted in parallel lines and therefore suggests no between-chemical interactions in our study.

Motor Composite Scores at 2 years: Bivariate relationships of Chemical Exposures

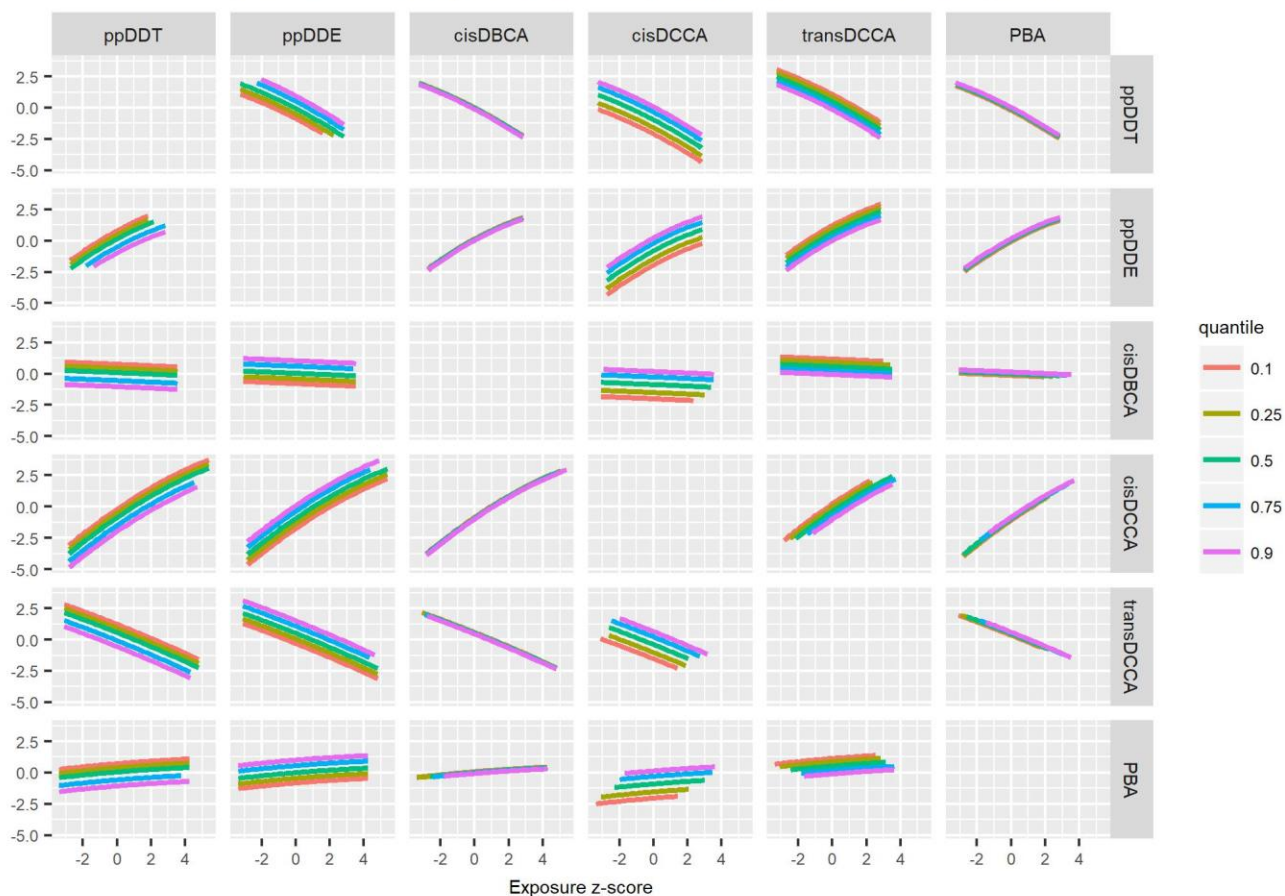

**Figure S16.** Bivariate relationships of chemical exposures in the relationship between DDT/pyrethroid insecticides and children’s performance on the Motor Composite scale of the Bayley Scales of Infant Assessment (3<sup>rd</sup> edition) (BSID) at 2 years, VHEMBE study, Limpopo, South Africa.

Figure S16 displays graphical output from Bayesian Kernel Machine Regression (BKMR) to indicate whether there is evidence for pair-wise interactions between chemical exposures. Plots show the exposure-response relationships of a specific chemical exposure, when the other member of the paired exposure is held at specified quantiles. For example, the second plot in the first row shows the exposure-response relationships for *p,p'*-DDE with the Bayley score when *p,p'*-DDT is held a quantiles of 10%, 25%, 50%, 75%, and 90%. The presence of non-parallel lines in these plots would provide evidence of a bivariate interaction between the paired exposures; however, each pair-wise exposure resulted in parallel lines and therefore suggests no between-chemical interactions in our study.
